# Supplementary material for: Applying XAI to an AI-based system for candidate management to mitigate bias and discrimination in hiring
Source: PubMed Central journal article supplement (PMC9764302; doi:10.1007/s12525-022-00600-9), 2022-12-20
Supplement: 12525_2022_600_MOESM1_ESM.pdf [file 12525_2022_600_MOESM1_ESM.pdf]

## Appendix

### Appendix A Candidate Profiles

| Job | Round | Type | Prenome   | Name      | Gender | Age | Birthplace    | Nationality | Lang. | Deg. | Exp. | Social | Extra |
|-----|-------|------|-----------|-----------|--------|-----|---------------|-------------|-------|------|------|--------|-------|
| 1   | 1     | 0    | Dirk      | Bauer     | Male   | 41  | Solingen      | German      | 3     | 4    | 3    | 3      | 2     |
| 1   | 1     | 1    | Mustafa   | Özdemir   | Male   | 43  | Tarsus        | Turkish     | 2     | 3    | 4    | 3      | 3     |
| 1   | 2     | 1    | Ecrin     | Şahin     | Female | 37  | Adana         | Turkish     | 4     | 3    | 1    | 2      | 4     |
| 1   | 2     | 0    | Stephanie | Jung      | Female | 39  | Kerpen        | German      | 3     | 2    | 2    | 4      | 3     |
| 1   | 3     | 99   | Paulina   | Krasny    | Female | 37  | Breslau       | Polish      | 1     | 3    | 2    | 2      | 4     |
| 1   | 3     | 98   | Wolfgang  | Fischer   | Male   | 54  | Wittlich      | German      | 3     | 2    | 5    | 1      | 1     |
| 1   | 4     | 99   | Mathias   | Eisenberg | Male   | 42  | Ulm           | German      | 1     | 2    | 3    | 1      | 3     |
| 1   | 4     | 98   | Dennis    | Zimmer    | Male   | 37  | Rosenheim     | German      | 3     | 4    | 2    | 3      | 2     |
| 1   | 5     | 1    | Miray     | Korkmaz   | Female | 34  | Istanbul      | Turkish     | 1     | 3    | 2    | 4      | 4     |
| 1   | 5     | 0    | Anke      | Faber     | Female | 33  | Minden        | German      | 2     | 2    | 3    | 4      | 3     |
| 1   | 6     | 99   | Maria     | van Dijk  | Female | 39  | Venlo         | Dutch       | 4     | 2    | 4    | 3      | 3     |
| 1   | 6     | 98   | Jürgen    | Fuhrmann  | Male   | 51  | Bramsche      | German      | 2     | 3    | 3    | 5      | 2     |
| 2   | 1     | 99   | Luisa     | Engel     | Female | 56  | Marburg       | German      | 3     | 4    | 4    | 2      | 2     |
| 2   | 1     | 98   | Sophia    | Thalberg  | Female | 47  | Lörrach       | German      | 2     | 3    | 3    | 4      | 5     |
| 2   | 2     | 98   | Oskar     | Borkowski | Male   | 37  | Lissa         | Polish      | 2     | 3    | 3    | 1      | 5     |
| 2   | 2     | 99   | Simone    | Wulf      | Female | 33  | Leipzig       | German      | 5     | 5    | 1    | 4      | 3     |
| 2   | 3     | 0    | Sven      | Kuster    | Male   | 33  | Flensburg     | German      | 2     | 4    | 3    | 2      | 4     |
| 2   | 3     | 1    | Thomas    | Ackermann | Male   | 54  | Tübingen      | German      | 2     | 2    | 4    | 4      | 3     |
| 2   | 4     | 1    | Monika    | Zimmer    | Female | 57  | Niebüll       | German      | 3     | 4    | 4    | 2      | 3     |
| 2   | 4     | 0    | Lisa      | Schaefer  | Female | 36  | Babelsberg    | German      | 2     | 5    | 3    | 4      | 2     |
| 2   | 5     | 98   | Philipp   | Neumann   | Male   | 54  | Essen         | German      | 2     | 3    | 4    | 5      | 4     |
| 2   | 5     | 99   | Katja     | Weiß      | Female | 36  | Halle (Saale) | German      | 4     | 2    | 3    | 5      | 2     |

|   |   |    |           |           |        |    |             |         |   |   |   |   |   |
|---|---|----|-----------|-----------|--------|----|-------------|---------|---|---|---|---|---|
| 2 | 6 | 0  | Martin    | Bach      | Male   | 39 | Nürnberg    | German  | 5 | 3 | 2 | 4 | 1 |
| 2 | 6 | 1  | Patrick   | Lehmann   | Male   | 51 | Hilden      | German  | 3 | 3 | 3 | 2 | 4 |
| 3 | 1 | 99 | Robin     | Winkler   | Male   | 51 | Wesel       | German  | 3 | 5 | 3 | 2 | 5 |
| 3 | 1 | 98 | Jannik    | Grunewald | Male   | 48 | Bocholt     | German  | 3 | 2 | 4 | 3 | 4 |
| 3 | 2 | 0  | Christian | Nacht     | Male   | 37 | Bayreuth    | German  | 2 | 3 | 3 | 5 | 2 |
| 3 | 2 | 1  | Katharina | Decker    | Female | 36 | Celle       | German  | 3 | 4 | 2 | 3 | 3 |
| 3 | 3 | 99 | Laura     | Fischer   | Female | 34 | Paderborn   | German  | 2 | 1 | 2 | 3 | 2 |
| 3 | 3 | 98 | Aylin     | Öztürk    | Female | 45 | Mersin      | Turkish | 4 | 2 | 4 | 2 | 3 |
| 3 | 4 | 0  | Arne      | Meyer     | Male   | 44 | Halberstadt | German  | 4 | 4 | 4 | 2 | 3 |
| 3 | 4 | 1  | Karin     | Richter   | Female | 42 | Fulda       | German  | 3 | 5 | 4 | 3 | 2 |
| 3 | 5 | 1  | Sophia    | Ostermann | Female | 34 | Dresden     | German  | 2 | 3 | 2 | 4 | 2 |
| 3 | 5 | 0  | Dominik   | Braun     | Male   | 33 | Rathenow    | German  | 3 | 4 | 1 | 2 | 3 |
| 3 | 6 | 98 | Anna      | Iwanow    | Female | 57 | Krasnojarsk | Russian | 3 | 4 | 5 | 3 | 2 |
| 3 | 6 | 99 | Aaron     | Becker    | Male   | 39 | Koblenz     | German  | 2 | 3 | 3 | 4 | 5 |

*Note.* Column Type: 0 = relevant; 1 = relevant with recommendation; 98 = non-relevant with recommendation; 99 = non-relevant. Lang. = Languages; Deg. = Degree; Exp. = Work Experience; Social = Social Skills; Extra = Dynamic Field.

## **Appendix B Questionnaires**

All questionnaires are based on a 7-point Likert scale.

### **Big Five Inventory (BFI-10)**

*Bitte geben Sie den Grad Ihrer Zustimmung zu folgenden Aussagen an.*

1. Ich bin eher zurückhaltend, reserviert.
2. Ich schenke anderen leicht Vertrauen, glaube an das Gute im Menschen.
3. Ich bin bequem, neige zur Faulheit.
4. Ich bin entspannt, lasse mich durch Stress nicht aus der Ruhe bringen.
5. Ich habe nur wenig künstlerisches Interesse.
6. Ich gehe aus mir heraus, bin gesellig.
7. Ich neige dazu, andere zu kritisieren.
8. Ich erledige Aufgaben gründlich.
9. Ich werde leicht nervös und unsicher.
10. Ich habe eine aktive Vorstellungskraft, bin fantasievoll.

### **Affinity for Technology Interaction (ATI)**

*Bitte geben Sie den Grad Ihrer Zustimmung zu folgenden Aussagen an.*

Mit „technischen Systemen“ sind sowohl Apps und andere Software-Anwendungen als auch komplette digitale Geräte (z.B. Handy, Computer, Fernseher, Auto-Navigation) gemeint.

1. Ich beschäftige mich gern genauer mit technischen Systemen.
2. Ich probiere gern die Funktionen neuer technischer Systeme aus.
3. In erster Linie beschäftige ich mich mit technischen Systemen, weil ich muss.
4. Wenn ich ein neues technisches System vor mir habe, probiere ich es intensiv aus.
5. Ich verbringe sehr gern Zeit mit dem Kennenlernen eines neuen technischen Systems.
6. Es genügt mir, dass ein technisches System funktioniert, mir ist es egal, wie oder warum.
7. Ich versuche zu verstehen, wie ein technisches System genau funktioniert.
8. Es genügt mir, die Grundfunktionen eines technischen Systems zu kennen.
9. Ich versuche, die Möglichkeiten eines technischen Systems vollständig auszunutzen.

### **Human Computer Trust Scale (HCTS)**

*Bitte geben Sie den Grad Ihrer Zustimmung zu folgenden Aussagen an.*

Eine künstliche Intelligenz (KI) lässt sich als System beschreiben, das die Fähigkeit besitzt, sich selbstständig an neue Situationen und Inhalte anzupassen. Es kann Probleme lösen und Aufgaben erledigen, die ein gewisses Maß an Intelligenz erfordern, wie sie typischerweise bei Menschen vorhanden ist.

1. Ich glaube, dass der Einsatz einer künstlichen Intelligenz negative Folgen haben könnte.
2. Ich glaube, ich muss vorsichtig sein, wenn ich eine künstliche Intelligenz verwende.
3. Es ist riskant, mit einer künstlichen Intelligenz zu interagieren.
4. Ich glaube, dass eine künstliche Intelligenz in meinem besten Interesse handeln wird.
5. Ich glaube, dass eine künstliche Intelligenz ihr Bestes tun wird, um mir zu helfen, wenn ich Hilfe benötige.

6. Ich glaube, dass eine künstliche Intelligenz daran interessiert ist, meine Bedürfnisse und Vorlieben zu verstehen.
7. Ich denke, dass eine künstliche Intelligenz bei der Auswahl von Bewerber:innen kompetent und effektiv ist.
8. Ich denke, dass eine künstliche Intelligenz ihre Rolle als Instrument zur Bewerberauswahl sehr gut erfüllt.
9. Ich glaube, dass eine künstliche Intelligenz über alle Funktionen verfügt, die ich von einem Hilfsmittel zur Bewerberauswahl erwarten würde.
10. Wenn ich eine künstliche Intelligenz verwende, denke ich, dass ich mich vollständig auf sie verlassen kann.
11. Ich kann mich immer auf eine künstliche Intelligenz verlassen, wenn es um die Entscheidungsfindung geht.
12. Ich kann den Informationen vertrauen, die mir eine künstliche Intelligenz liefert.

### **NASA Task Load Index (NASA-TLX)**

1. Wie viel geistige Anforderung war bei der Aufnahme und Verarbeitung von Informationen erforderlich? War die Aufgabe einfach oder komplex?
2. Wie erfolgreich haben Sie Ihrer Meinung nach die vom Versuchsleiter (oder Ihnen selbst) gesetzten Ziele erreicht?
3. Wie anstrengend war die Arbeit, um Ihren Grad an Aufgabenerfüllung zu erreichen?
4. Wie frustriert (unsicher, entmutigt, irritiert, gestresst und verärgert) fühlten Sie sich während der Aufgabe?

### **Ethics Position Questionnaire (EPQ)**

*Bitte geben Sie den Grad Ihrer Zustimmung zu folgenden Aussagen an.*

1. Das Wohl anderer zu opfern, ist niemals wirklich notwendig.
2. Moralische Standards sollten als etwas Individuelles gesehen werden: Was eine Person als moralisch ansieht, kann eine andere als unmoralisch bewerten.
3. Die Würde und das Wohlergehen der Menschen sollten die wichtigste Sorge in jeder Gesellschaft sein.
4. Ob eine Lüge als unmoralisch oder sogar moralisch zu beurteilen ist, hängt ganz von den Umständen ab.
5. In sozialen Beziehungen sind ethische Probleme oft so komplex, dass man Personen erlauben sollte, ihre eigenen persönlichen Regeln zu finden.
6. Was „ethisch“ ist, variiert zwischen Situationen und Kulturen.
7. Es ist unmoralisch, negative Folgen einer Handlung durch positive Folgen verrechnen zu wollen.
8. Man darf andere Personen weder psychisch noch physisch schädigen.
9. Wenn eine Handlung eine unschuldige Person schädigen könnte, muss man sie unterlassen.
10. Es gibt keine ethischen Prinzipien, die so wichtig sind, dass sie eine allgemeingültige Vorschrift bilden könnten.
11. Moralisches Handeln liegt dann vor, wenn es der Ideal-Handlung entspricht.
12. Man darf keine Handlungen ausführen, die in irgendeiner Weise die Würde und das Wohlergehen anderer Personen bedrohen.
13. Eine starre Ethik-Vorschrift, die bestimmte Handlungsmöglichkeiten verhindern soll, kann der Verbesserung sozialer Beziehungen sogar im Wege stehen.

14. Risiken in Kauf zu nehmen, die andere Personen betreffen, ist nicht tolerierbar, egal wie gering sie sind.
15. Potentielle Schädigungen Dritter in Kauf zu nehmen, ist immer schlecht, egal welche guten Zwecke verfolgt werden.
16. Moralische Standards sind jeweils persönliche Regeln, sie sollten nicht auf die Beurteilung anderer angewendet werden.
17. Die Frage, was ethisch richtig ist, wird sich niemals beantworten lassen, da es sich bei der Entscheidung, was moralisch oder unmoralisch ist, um eine persönliche Entscheidung handelt.
18. Man sollte sichergehen, mit seinen Handlungen niemanden zu verletzen oder zu schädigen.
19. Verschiedene Arten von Moral dürfen nicht als mehr oder weniger „Gut“ bewertet werden.
20. Über das Lügen lässt sich keine Regel formulieren; ob eine Lüge zulässig ist oder nicht, hängt von der Situation ab.

## Appendix C Participants Reasons

The categories are coded in column C as follows:

- q = Qualification
- k = Recommendation
- r = Race
- a = Age
- e = Ethical
- o = Subjective
- x = Excluded

The tables are sorted according to the conditions.

**Table C1** Candidate Selection Reasons of Participants in Condition 1

| ID                         | Reason 1                                                                                           | C | Reason 2                                                                                                         | C    | Reason 3                                                                       | C    |
|----------------------------|----------------------------------------------------------------------------------------------------|---|------------------------------------------------------------------------------------------------------------------|------|--------------------------------------------------------------------------------|------|
| <b>Condition 1 – Job 1</b> |                                                                                                    |   |                                                                                                                  |      |                                                                                |      |
| 1335                       | bessere Berufserfahrung                                                                            | q | bessere Softskills                                                                                               | o    | bessere Programmierungserfahrung                                               | q    |
| 1352                       | mehr Erfahrung                                                                                     | q | wichtigere Skills                                                                                                | o    | bessere qsverteilung                                                           | q    |
| 1363                       | Sprachen                                                                                           | q | Berufserfahrung macht sie mit Programmiererfahrung wett                                                          | q    | Berufserfahrung macht sie mit Programmiererfahrung wett                        | q    |
| 1387                       | programmiererfahrung                                                                               | q | programmeirefahrung                                                                                              | q    | programmieren                                                                  | q    |
| 1402                       | Bessere Berufserfahrung und Programmiererfahrung                                                   | q | Bessere soziale Skills                                                                                           | o    | Programmiererfahrung und guter Abschluss                                       | q    |
| 1415                       | Berufserfahrung & Programmierung sind wichtig                                                      | q | Soziale Skills stehen hier über den niedrigen Erfahrungen des Mitbewerbers                                       | q    | In allen Bereichen gut                                                         | q    |
| 1433                       | alle Fähigkeiten gut ausgeglichen, hat mehr Berufserfahrung                                        | q | Hat gute Programmiererfahrung                                                                                    | q    | Erfahrung und Skills                                                           | q    |
| 1439                       | Berufserfahrung und Programmiererfahrung sind Vorteil, da höher bewertet als bei anderem Bewerber. | q | Die höhere Berufserfahrung erscheint hier in Kombination mit der geringeren Programmiererfahrung als geeigneter. | q    | Mehr Berufserfahrung erscheint als Vorteil.                                    | q    |
| 1452                       | Hat bessere Programmiererfahrung                                                                   | q | Bessere Social Skills                                                                                            | q    | Bessere Programmiererfahrung                                                   | q    |
| 1473                       | diversität ist auch wichtig                                                                        | e | mehr Erfahrung                                                                                                   | q    | mehr programmiererfahrung                                                      | q    |
| 1498                       | Berufserfahrung und skills, sonst sind beide ähnlich gut                                           | q | Skills ähnlich, aber der 2. Kandidat kann sich wahrscheinlich besser ins Team integrieren                        | q, o | Beide Kandidaten sind ähnlich gut, jedoch hat die 2. Kandidatin mehr überzeugt | q, o |
| 1501                       | Mehr Erfahrung die für Beruf relevant sind                                                         | q | mehr Kompetenz die für Beruf relevant sind                                                                       | q    | Bessere Kompetenz                                                              | q    |

|      |                                                                                                                                                                                                                                                                                                                                                                                                                                                                                                          |   |                                                                                                                                                                                                                                                                                                                                       |   |                                                                                                                                                                           |   |
|------|----------------------------------------------------------------------------------------------------------------------------------------------------------------------------------------------------------------------------------------------------------------------------------------------------------------------------------------------------------------------------------------------------------------------------------------------------------------------------------------------------------|---|---------------------------------------------------------------------------------------------------------------------------------------------------------------------------------------------------------------------------------------------------------------------------------------------------------------------------------------|---|---------------------------------------------------------------------------------------------------------------------------------------------------------------------------|---|
| 1514 | Programmiererfahrung und Berufserfahrung                                                                                                                                                                                                                                                                                                                                                                                                                                                                 | q | Programmiererfahrung                                                                                                                                                                                                                                                                                                                  | q | Bessere Fähigkeiten                                                                                                                                                       | o |
| 1524 | Dem anderen Bewerber in Sachen Methodenkompetenz überlegen                                                                                                                                                                                                                                                                                                                                                                                                                                               | q | Mehr Berufserfahrung                                                                                                                                                                                                                                                                                                                  | q | bessere Programmierkenntnis und besseren Abschluss als die Konkurrentin                                                                                                   | q |
| 1532 | Da er mehr Beruf und Programmiererfahrung als der andere Kandidat hat.                                                                                                                                                                                                                                                                                                                                                                                                                                   | q | Sie hat mehr Programmiererfahrung ea für den Job wichtiger ist                                                                                                                                                                                                                                                                        | q | Soziale Skills, Programmiererfahrung besser                                                                                                                               | q |
| 1535 | Die Person weiß wie man programmiert. Beim Informatikstudium lernt man das nicht.                                                                                                                                                                                                                                                                                                                                                                                                                        | o | IT Skills sind am Wichtigsten                                                                                                                                                                                                                                                                                                         | q | das ist die beste Mischung                                                                                                                                                | o |
| 1550 | Bessere Programmiererfahrung                                                                                                                                                                                                                                                                                                                                                                                                                                                                             | q | Soziale Skills nicht ganz so wichtig, da keine Führungsposition, Programmiererfahrung wichtiger.                                                                                                                                                                                                                                      | q | Mehr Programmiererfahrung                                                                                                                                                 | q |
| 1551 | Abschluss und Erfahrung                                                                                                                                                                                                                                                                                                                                                                                                                                                                                  | q | Abschluss und Erfahrung                                                                                                                                                                                                                                                                                                               | q | Allrounder                                                                                                                                                                | o |
| 1567 | Der Bewerber verfügt im Vergleich zum Mitbewerber über eine höhere Programmier- und Berufserfahrung. Dies erscheint mir wichtiger als die Sprachkenntnisse und der Abschluss.                                                                                                                                                                                                                                                                                                                            | q | Die Programmiererfahrung scheint mir bei dem Job die entscheidende q zu sein und diese ist bei diesem Bewerber höher ausgeprägt.                                                                                                                                                                                                      | q | Bis auf die Sprachkenntnisse scheint die Bewerberin über gute qen zu verfügen. Ein Sprachkurs könnte Bedingung für die Einstellung sein.                                  | q |
| 1580 | mehr Berufserfahrung                                                                                                                                                                                                                                                                                                                                                                                                                                                                                     | q | mehr Berufserfahrung und soziale skills                                                                                                                                                                                                                                                                                               | q | mehr berufserfahrung                                                                                                                                                      | q |
| 1589 | Programmiererfahrung                                                                                                                                                                                                                                                                                                                                                                                                                                                                                     | q | Programmiererfahrung                                                                                                                                                                                                                                                                                                                  | q | Programmiererfahrung und skills als ITler                                                                                                                                 | q |
| 1597 | Programmiererfahrung sowie Berufserfahrung definitiv relevanter als der Abschluss                                                                                                                                                                                                                                                                                                                                                                                                                        | q | Programmiererfahrung sowie mehr Berufserfahrung ist hier ausschlaggebend                                                                                                                                                                                                                                                              | q | Berufserfahrung ist hier der entscheidende Grund für Bewerber Faber                                                                                                       | q |
| 1623 | Insgesamt war die Anzahl der Sterne über alle Kategorien hinweg für die zwei Bewerber gleich. Allerdings hat Mustafa Özdemir im Hinblick auf Programmiererfahrung und Berufserfahrung besser abgeschnitten (Ich glaube das sind die relevanteren Fähigkeiten/Erfahrungen für diesen Beruf). Ich glaube nicht, dass es für diesen Beruf wichtig ist, verschiedene Sprachen zu sprechen. Auch ist der theoretische Abschluss auch nicht unbedingt aussagekräftig für eine solche sehr praktische Tätigkeit | q | Die zuvor genannten wichtigen Aspekte (Programmiererfahrung und Berufserfahrung) sind unter den Bewerberinnen ausgeglichen - auch die Gesamtzahl der Sterne ist identisch. Die in meinen Augen nachfolgend wichtige Eigenschaft ist soziale Skills, da anwenderspezifische Fragestellungen der Belegschaft beantwortet werden müssen. | q | Gesamtzahl der Sterne identisch - ausgeglichen im Hinblick auf Programmiererfahrung, soziale Skills und Berufserfahrung. Abschluss in meinen Augen wichtiger als Sprachen | q |
| 1625 | Programmiererfahrung und Berufserfahrung wichtig                                                                                                                                                                                                                                                                                                                                                                                                                                                         | q | Soziale Skills wichtig bei Fragen, und Berufserfahrung ist auch wichtig                                                                                                                                                                                                                                                               | q | sehr gute Werte auf den wichtigsten, soziale skills und Programmiererfahrung                                                                                              | q |
| 1639 | Mehr Berufs- sowie Programmierungserfahrungen vorhanden                                                                                                                                                                                                                                                                                                                                                                                                                                                  | q | Hohe Programmierungserfahrung                                                                                                                                                                                                                                                                                                         | q | Bessere Programmierungserfahrung                                                                                                                                          | q |
| 1643 | Berufserfahrung höher                                                                                                                                                                                                                                                                                                                                                                                                                                                                                    | q | Bessere Programmiererfahrung                                                                                                                                                                                                                                                                                                          | q | Intuition                                                                                                                                                                 | o |
| 1651 | höhere Berufserfahrung & Programmiererfahrung                                                                                                                                                                                                                                                                                                                                                                                                                                                            | q | mehr berufserfahrung                                                                                                                                                                                                                                                                                                                  | q | Sprachen besser                                                                                                                                                           | q |
| 1658 | Trotz schlechterer Sprache, längere Erfahrungen in der Branche und bessere Kenntnisse!                                                                                                                                                                                                                                                                                                                                                                                                                   | q | Bessere wichtige Qualitäten, wie soziale Fähigkeiten und langwierige Erfahrung!                                                                                                                                                                                                                                                       | q | Längere Erfahrung, ausgeglichene Punktverteilung!                                                                                                                         | q |

|                            |                                                                                                                  |      |                                                                                                                                                                               |         |                                                                                                                                                           |      |
|----------------------------|------------------------------------------------------------------------------------------------------------------|------|-------------------------------------------------------------------------------------------------------------------------------------------------------------------------------|---------|-----------------------------------------------------------------------------------------------------------------------------------------------------------|------|
| 1673                       | Technisches Know-How aus der Berufserfahrung (und insbesondere Programmiererfahrung) waren ausschlaggebend.      | q    | Bei nur leicht abweichenden Programmiererfahrungen unterscheiden sich die Bewerber:innen v. a. in den Social Skills, die letztlich ausschlaggebend waren.                     | q       | Abschluss und Programmiererfahrung können den leichten Unterschied bei der Berufserfahrung (einziger wichtiger Unterschied) über Zeit wettmachen.         | q    |
| 1674                       | bessere Berufserfahrung, mehr Programmiererfahrung                                                               | q    | Mehr Berufserfahrung nötig in der Umgebung                                                                                                                                    | q       | sehr viel Berufserfahrung und viele soziale Skills                                                                                                        | q    |
| 1683                       | Programmiererfahrung                                                                                             | q    | Abschluss, Programmiererfahrung                                                                                                                                               | q       | allgemein besser                                                                                                                                          | o    |
| 1689                       | bessere Programmiererfahrungen                                                                                   | q    | bessere Sprache und Abschluss                                                                                                                                                 | q       | bessere Programmiererfahrung                                                                                                                              | q    |
| 1692                       | Programmier- und Berufserfahrung besser.                                                                         | q    | Gesamtpaket besser. Sprachen bzw. Abschluss sind in diesem Fall nicht so wichtig-                                                                                             | q       | Hier wurde der Bewerber mit mehr Berufserfahrung gewählt. Der Abschluss mit 2 Sternen ist wahrscheinlich mit einem ausländischen 3 Sterne zu vergleichen. | q, r |
| 1708                       | Berufserfahrung & Programmiererfahrung                                                                           | q    | Abschluss & Programmiererfahrung                                                                                                                                              | q       | Abschluss & Programmiererfahrung                                                                                                                          | q    |
| 1739                       | Programmierkenntnisse essentiell                                                                                 | q    | Sozial Skills durch Beratung auch relevant                                                                                                                                    | q       | Ausgeglichener                                                                                                                                            | o    |
| 1741                       | mehr Berufs- und Programmiererfahrung                                                                            | q    | mehr Social Skills                                                                                                                                                            | q       | ähnliche gute Optionen                                                                                                                                    | o    |
| 1753                       | mehr Berufserfahrung                                                                                             | q    | bessere Programmiererfahrung                                                                                                                                                  | q       | mehr Berufserfahrung                                                                                                                                      | q    |
| 1764                       | Jünger mit sprachlichen Vorteilen                                                                                | q, a | Jünger mit sprachlichen Vorteilen                                                                                                                                             | q, a    | Mehr Berufserfahrung                                                                                                                                      | q    |
| 1773                       | Berufserfahrung gleich Abschluss aus. Soziale Skills und Programmiererfahrung sind besser.                       | q    | Programmiererfahrung ist wahrscheinlich wichtiger als Soziale Skills. Sprachen und Abschluss besser                                                                           | q       | Mehr Programmiererfahrung, besserer Abschluss. Berufserfahrung nur ein Stern schlechter                                                                   | q    |
| 1774                       | Berufserfahrung wiegt mehr als Abschluss                                                                         | q    | viel Programmiererfahrung                                                                                                                                                     | q       | mehr Programmiererfahrung                                                                                                                                 | q    |
| 1796                       | mehr Berufs- und Programmiererfahrung                                                                            | q    | Soziale Skills für diesen Job wichtig, und Stephanie Jung hat da mehr Sterne                                                                                                  | q       | Mehr Berufserfahrung und Programmiererfahrung                                                                                                             | q    |
| 1802                       | höhere Erfahrung                                                                                                 | q    | höhere qen in den Schlüsselementen                                                                                                                                            | q       | Bessere Programmiererfahrung und besserer Abschluss                                                                                                       | q    |
| 1803                       | höherer Abschluss                                                                                                | q    | Programmierer haben oft wenig soziale Skills, sind aber im Programmieren sehr gut                                                                                             | q       | Besserer Durchschnitt der Werte                                                                                                                           | q    |
| 1825                       | Mehr Berufserfahrung und mehr Programmiererfahrung. Ich denke, das kompensiert seine mangelnde Sprachkenntnisse. | q    | Mehr Berufserfahrung und mehr soziale Skills. Obwohl ein IT-Job auf den ersten Blick keine mega sozialen Skills voraussetzt, ist es für die Teamfähigkeit schon sehr wichtig. | q       | Super Abschluss, super soziale Skills und super Programmiererfahrung. Sprachkurs kann sie ja noch machen.                                                 | q    |
| 1826                       | mehr berufserfahrung                                                                                             | q    | mehr berufserfahrung, sozialer                                                                                                                                                | q       | mehr berufserfahrung                                                                                                                                      | q    |
| 1848                       | Ähnliche Kompetenzen, mehr Programmiererfahrung.                                                                 | q    | Kompetenzen unterscheiden sich nicht wesentlich, Frauen sollten in der IT unterstützt werden.                                                                                 | q, g, e | Ist in allem überlegen außer in Berufserfahrung und Sprachen, was vernachlässigbar ist.                                                                   | q    |
| 1854                       | Programmiererfahrung für diese Stelle sehr wichtig                                                               | q    | soziale skills bei Kundenkontakt sehr wichtig                                                                                                                                 | q       | Berufserfahrung und Programmiererfahrung gleich wichtig                                                                                                   | q    |
| <b>Condition 1 – Job 2</b> |                                                                                                                  |      |                                                                                                                                                                               |         |                                                                                                                                                           |      |
| 1335                       | bessere Softskills                                                                                               | q    | bessere Softskills                                                                                                                                                            | q       | bessere Softskills                                                                                                                                        | q    |
| 1352                       | Social Skills                                                                                                    | q    | bessere Kombination                                                                                                                                                           | o       | ausgeglicheneres Profil                                                                                                                                   | o    |
| 1363                       | ich wollte eigentlich doch den anderen wählen                                                                    | x    | Soziale skills                                                                                                                                                                | q       | Der andere hat zu wenig Methodenkenntnis                                                                                                                  | q    |
| 1387                       | social skills sind wichtig                                                                                       | q    | in allem etwas besser                                                                                                                                                         | o       | in allem etwas besser                                                                                                                                     | q    |

|      |                                                                                                                                                                                              |      |                                                                                                            |      |                                                                                                                  |      |
|------|----------------------------------------------------------------------------------------------------------------------------------------------------------------------------------------------|------|------------------------------------------------------------------------------------------------------------|------|------------------------------------------------------------------------------------------------------------------|------|
| 1402 | Berufserfahrung                                                                                                                                                                              | q    | Berufserfahrung, Methodenkompetenz                                                                         | q    | jünger                                                                                                           | a    |
| 1415 | In allen wichtigen Bereichen gut geeignet                                                                                                                                                    | q    | Soziale Skills sind wichtig für den Job, in Kombination mit gutem Abschluss                                | q    | In allen Bereichen durchschnittlich gut                                                                          | q    |
| 1433 | Berufserfahrung, soziale Skills                                                                                                                                                              | q    | guter Abschluss und genug Erfahrung, gute Methodenkompetenz daher geeignet                                 | q    | alle Fähigkeiten gut ausgeglichen und sehr gute Methodenkompetenz                                                | q    |
| 1439 | Berufserfahrung und soziale Skills sind höher bewertet.                                                                                                                                      | q    | Methodenkompetenz, Sprache und Berufserfahrung erscheinen als Vorteil im Vergleich zur anderen Bewerberin. | q    | Mehr Berufserfahrung und Methodenkompetenz erscheinen als Vorteil im Rahmen der Jobbeschreibung.                 | q    |
| 1452 | Jünger und gute Methodenkompetenz                                                                                                                                                            | q, a | Gute qen                                                                                                   | q    | Bessere Methodenkompetenz                                                                                        | q    |
| 1473 | mehr erfahrung                                                                                                                                                                               | q    | mehr erfahrungen                                                                                           | q    | mehr erfahrungen                                                                                                 | q    |
| 1498 | Erfahrung und einer, der Verantwortung gut übernehmen könnte.                                                                                                                                | q    | Genereller Mix der Skills ist besser                                                                       | o    | Erfahrener                                                                                                       | o    |
| 1501 | Jünger und mehr Sterne in den relevanten Bereichen                                                                                                                                           | q, a | jünger                                                                                                     | a    | Zwar weniger Methodenkompetenz aber man kann dies erlernen, da Bewerber noch sehr jung ist.                      | q, a |
| 1514 | Hohe Berufserfahrung und Social Skills sprechen für solide Aufgabenbewältigung                                                                                                               | q    | Social Skills                                                                                              | q    | Jünger Kommunikationstalent aufgrund von Sprachen und ausgeprägte soziale Skills                                 | q, a |
| 1524 | sehr guter Abschluss und Methodenkompetenz, Alter spielt eine Rolle                                                                                                                          | q, a | in den meißten Punkten der anderen Kandidatin überlegen                                                    | q    | Methodenkompetenz und Berufserfahrung überzeugen                                                                 | q    |
| 1532 | Besser                                                                                                                                                                                       | o    | Soziale Skills sind besser                                                                                 | q    | Hier haben die andere sachen überwogen auch wenn social skills schlechter war                                    | q    |
| 1535 | Ohne Gescheiten Abschluss und ohne Informatikstudium weiß der eh nicht von was der redet                                                                                                     | o    | Wer Projektleitung machen will braucht auch gute soziale Fähigkeiten                                       | q    | Der typ ist die beste Mischung. Bei den Nerds ist das eh egal. Du fütterst die mit Clubmate dann passt das schon | o    |
| 1550 | Mehr Berufserfahrung, 2 Mehr Soziale Skills                                                                                                                                                  | q    | Mehr Methodenkompetenz und Berufserfahrung.                                                                | q    | Methodenkompetenz                                                                                                | q    |
| 1551 | jung und gut ausgebildet                                                                                                                                                                     | q, a | im direkten vergleich jung und gut ausgebildet                                                             | q, a | Allrounder                                                                                                       | o    |
| 1567 | Die Methodenkompetenz ist höher als beim Mitbewerber. Die Soziale Kompetenz ist zwar geringer ausgeprägt aber dafür verfügt dieser Bewerber zusätzlich über einen qualifizierteren Abschluss | q    | Das Profil scheint ausgeglichener als das der Mitbewerberin.                                               | o    | Die Methodenkompetenz der Mitbewerbers ist zu gering.                                                            | q    |
| 1580 | guter abschluss                                                                                                                                                                              | q    | Guter Abschluss                                                                                            | q    | jünger                                                                                                           | a    |
| 1589 | BE + soziale Skills besser als 1 fehlender Stern bei Methodenkompetenz                                                                                                                       | q    | Methodenkompetenz                                                                                          | q    | methodenkompetenz                                                                                                | q    |
| 1597 | Berufserfahrung, Soziale Skills und Methodenkompetenz bewerte ich für den Job als relevanter. Bewerber Ackermann hat hier mehr Kompetenzen                                                   | q    | Bessere Berufserfahrung, Methodenkompetenz und mehr Spracherfahrung                                        | q    | gleichmäßigere Kompetenzen in allen Bereichen bei Lehmann                                                        | q    |
| 1623 | Thomas hat im Hinblick auf Methodenkompetenz, soziale Skills und Berufserfahrung mehr Sterne                                                                                                 | q    | In Bezug auf Methodenkompetenz und soziale Skills bei Monika mehr Sterne                                   | q    | Um eineiges mehr Methodenkompetenz                                                                               | q    |

|      |                                                                                                                      |      |                                                                                                                                                                                     |      |                                                                                                                                                      |      |
|------|----------------------------------------------------------------------------------------------------------------------|------|-------------------------------------------------------------------------------------------------------------------------------------------------------------------------------------|------|------------------------------------------------------------------------------------------------------------------------------------------------------|------|
| 1625 | Berufserfahrung und soziale Skills gut                                                                               | q    | soziale Skills wichtig                                                                                                                                                              | q    | Methodenkompetenz und Berufserfahrung wichtig                                                                                                        | q    |
| 1639 | Mehr Berufserfahrung von Vorteil                                                                                     | q    | Mehr Berufserfahrung und bessere Methodenkompetenz machen Bewerber geeigneter                                                                                                       | q    | Methodenkompetenz in diesem Bereich sehr wichtig. Höhere Berufserfahrung vorteilhaft.                                                                | q    |
| 1643 | Abschluss und Methodenkompetenz überdurchschnittlich. Soziale Fähigkeiten sind ausbaufähig.                          | q    | Höhere Berufserfahrung; bessere Methodenkompetenz.                                                                                                                                  | q    | Höhere Werte in Berufserfahrung und Methodenkompetenz.                                                                                               | q    |
| 1651 | Gesamtprofil stimmiger. Abschluss weniger relevant als Berufserfahrung                                               | q    | Höhere Berufserfahren. Social Skills könnte man schulen.                                                                                                                            | q    | Hohe Methodenkompetenz und höhere Berufserfahrung                                                                                                    | q    |
| 1658 | Trotz hohen Alters, bessere Kompetenzen als Mitstreiter!                                                             | q, a | keine Angabe                                                                                                                                                                        | x    | Potential erkennbar im Bereich der Kompetenzen!                                                                                                      | q    |
| 1673 | Der Bewerber scheint mehr praktische Erfahrung versus überwiegend theoretischer des anderen mitzubringen.            | q    | Methodenkompetenz i. V. m. der Berufserfahrung waren ausschlaggebend gegenüber hauptsächlich theoretischen Uni(?)-Kenntnissen.                                                      | q    | Sprachenkenntnisse (des anderen Bewerbers) überwiegen trotz ihrer Exzellenz auf keinen Fall die Methodenkompetenz (und Berufserfahrung) des anderen. | q    |
| 1674 | viel Erfahrung, was den schlechten Abschluss aufwiegt                                                                | q    | sehr guter Abschluss, Methodenkompetenz kann sie lernen                                                                                                                             | q    | mehr Erfahrung                                                                                                                                       | q    |
| 1683 | Erfahrung und Soziale Skills                                                                                         | q    | Alter                                                                                                                                                                               | a    | der andere hat zu wenig Methodenkompetenz                                                                                                            | q    |
| 1689 | guter Abschluss und Methodenkompetenz                                                                                | q    | Bessere Methodenkompetenz und mehr Berufserfahrung                                                                                                                                  | q    | jünger, bessere soziale Skills                                                                                                                       | q, a |
| 1692 | Obwohl älter, sind hier doch die Sterne bei sozialen Skills und Berufserfahrung entscheidend für meine Entscheidung. | q, a | Berufserfahrung kann noch gesammelt werden (Altersvergleich) und Methodenkompetenz gesammelt (besserer Abschluss). Trotz des besseren Abschluss sind auch die Social skills besser. | q, a | Die Methodenkompetenz ist in diesem Fall ausschlaggebend.                                                                                            | q    |
| 1708 | Berufserfahrung & soziale Skills                                                                                     | q    | Berufserfahrung & Methodenkompetenz                                                                                                                                                 | q    | Berufserfahrung & Methodenkompetenz                                                                                                                  | q    |
| 1739 | Berufserfahrung > Abschluss                                                                                          | q    | Ausgeglichenerere Punktzahl                                                                                                                                                         | q    | Ausgeglichener                                                                                                                                       | o    |
| 1741 | bessere Social Skills                                                                                                | q    | höhere Social Skills                                                                                                                                                                | q    | wenig Berufserfahrung und wenig Methodenkompetenz beim anderen Kandidaten                                                                            | q    |
| 1753 | höhere Berufserfahrung                                                                                               | q    | bessere Methodenkompetenz                                                                                                                                                           | q    | bessere Methodenkompetenz                                                                                                                            | q    |
| 1764 | Alter ist für Projektmanagement geeigneter                                                                           | a, o | Soziale Skills der Alternative zu gering                                                                                                                                            | q    | Soziale Skills der Alternative zu gering                                                                                                             | q    |
| 1773 | Mehr Berufserfahrung könnte den Abschluss aufwiegen. Soziale Skills sind besser.                                     | q    | Schwierige Entscheidung. Gleiche Anzahl an Sternen, aber die Verteilung gefällt mir etwas besser.                                                                                   | o    | Sprachen sind nicht so wichtig, Methodenkompetenz deutlich besser.                                                                                   | q    |
| 1774 | Soziale Skills wichtig für die Position                                                                              | q    | Soziale Skills wichtig für die Position                                                                                                                                             | q    | Soziale Skills wichtig für die Position, Methodenkompetenz kann evtl. aufgrund seines Alters noch ausgebaut werden                                   | q, a |
| 1796 | viel Berufserfahrung und soziale Skills                                                                              | q    | bleibt wahrscheinlich längere m Unternehmen, da jünger                                                                                                                              | a    | Martin Bach ist noch jung und kann durch seine guten sozialen Skills die fehlende Methodenkompetenz ausgleichen bzw. erlernen                        | q, a |
| 1802 | auch hier überwiegen soziale Skills, Methodenkompetenz und zstzl die Berufserfahrung                                 | q    | insgesamt bessere q verteilt auf die verschiedenen Bereiche                                                                                                                         | q    | Methodenkompetenz als Schlüsselqualifikation besser ausgeprägt                                                                                       | q    |

|                            |                                                                                              |      |                                                                                                                  |      |                                                                                                                                                       |      |
|----------------------------|----------------------------------------------------------------------------------------------|------|------------------------------------------------------------------------------------------------------------------|------|-------------------------------------------------------------------------------------------------------------------------------------------------------|------|
| 1803                       | jünger                                                                                       | a    | guter Abschluss, jung                                                                                            | q, a | Methodenkompetenz besser                                                                                                                              | q    |
| 1825                       | Mehr Berufserfahrung und mehr soziale Skills                                                 | q    | mehr soziale Skills. die geringere Methodenkompetenz kann auch mit der geringeren Berufserfahrung zusammenhängen | q    | Sehr schwierige Entscheidung. Aber ich denke man kann an der Methodenkompetenz (durch Schulungen, etc.) noch besser arbeiten als an den social skills | q    |
| 1826                       | bessere methodenkompetenz                                                                    | q    | bessere methodenkompetenz                                                                                        | q    | bessere methodenkompetenz                                                                                                                             | q    |
| 1848                       | Soziale Kompetenz ist für das Projektmanagement sehr wichtig.                                | q    | Soziale Skills sind wichtig und eher nicht erlernbar, anders als die Methodenkompetenz.                          | q    | Soziale Skills sind unabdingbar.                                                                                                                      | o    |
| 1854                       | gute Mischung aus allem                                                                      | q    | Methodenkompetenz wichtig                                                                                        | q    | Methodenkompetenz etwas wichtiger als soziale skills                                                                                                  | q    |
| <b>Condition 1 – Job 3</b> |                                                                                              |      |                                                                                                                  |      |                                                                                                                                                       |      |
| 1335                       | bessere Soft Skills                                                                          | q    | bessere Softskills                                                                                               | q    | bessere Softskills                                                                                                                                    | q    |
| 1352                       | hat wichtigere Skills                                                                        | o    | mehr Softwareskills                                                                                              | q    | Abschluss besser                                                                                                                                      | q    |
| 1363                       | social skills sind hier nicht so wichtig                                                     | q    | social skills sind hier nicht so wichtig                                                                         | q    | mehr Erfahrungen                                                                                                                                      | q    |
| 1387                       | alles sehr solide                                                                            | o    | abschluss                                                                                                        | q    | social skills und abschluss                                                                                                                           | q    |
| 1402                       | soziale Skills                                                                               | q    | weiblich                                                                                                         | g    | berufserfahrung, weiblich                                                                                                                             | q, g |
| 1415                       | Durchschnittlich in jedem Bereich und daher vermutlich gut anpassungsfähig und lernbereit    | q, o | Bessere soziale Skills & Berufserfahrung                                                                         | q    | Guter Abschluss und Erfahrung mit Software                                                                                                            | q    |
| 1433                       | Abschluss besser                                                                             | q    | gut ausgewogene Fähigkeiten                                                                                      | q    | Erfahrung und soziale Skills besser                                                                                                                   | q    |
| 1439                       | Mehr Softwareerfahrung erscheint als Vorteil.                                                | q    | Höhere Bewertung der Softwareerfahrung erscheint als Vorteil.                                                    | q    | Berufserfahrung erscheint hier als Vorteil.                                                                                                           | q    |
| 1452                       | Gute Softwareskills und Social Skills                                                        | q    | Mehr Softwareerfahrung                                                                                           | q    | Jünger und bessere Softwareerfahrung                                                                                                                  | q, a |
| 1473                       | bessere Software Skills                                                                      | q    | besseren Abschluss                                                                                               | q    | soziale skills sind auch wichtig                                                                                                                      | q    |
| 1498                       | Beide Kandidaten sind ähnlich gut, aber der 2. Kandidat ist leicht besser                    | o    | Beide Kandidaten ähnlich gut                                                                                     | o    | Soziale Skills und Berufserfahrung                                                                                                                    | q    |
| 1501                       | mehr sterne an den relevanten stellen                                                        | q    | qualifizierter                                                                                                   | o    | relevantere Kompetenzen                                                                                                                               | o    |
| 1514                       | bessere erfahrung                                                                            | q    | wieder bessere erfahrung, social skills unwichtig bei einem buchhalter                                           | q    | jünger und mehr erfahrungen                                                                                                                           | q, a |
| 1524                       | Super Abschluss und Softwareerfahrung, social skills sind für die Buchhaltung nicht relevant | q    | guter Abschluss, viel Berufserfahrung und Softwarekenntnis                                                       | q    | sehr guter Abschluss und Softwarekenntnis                                                                                                             | q    |
| 1532                       | Bessere Soziale Skills und beruferfahug                                                      | q    | Gesamt einfach besser                                                                                            | o    | Wegen Software erfahrung und abschluss                                                                                                                | q    |
| 1535                       | Die hat die größte Fachkompetenz                                                             | o    | Solange der keine Leitung macht ist es egal                                                                      | o    | Buchhalter brauchen nur Rechnungslegungswissen.                                                                                                       | o    |
| 1550                       | Soziale Skills eher unwichtig                                                                | q    | Softwareerfahrung ist besser                                                                                     | q    | Bessere Softwareerfahrung                                                                                                                             | q    |
| 1551                       | Social Skills                                                                                | q    | Allrounder                                                                                                       | q    | Abschluss und Erfahrung                                                                                                                               | q    |
| 1567                       | Dieses Profil erscheint ausgeglichener.                                                      | o    | Dieser Bewerber verfügt über bessere Softwareerfahrung.                                                          | q    | Bessere Softwareerfahrung                                                                                                                             | q    |
| 1580                       | soziale skills                                                                               | q    | Ausgewogenere fähigkeitenverteilung                                                                              | q    | guter abschluss                                                                                                                                       | q    |
| 1589                       | breiter aufgestllt                                                                           | q    | Softwareerfahrung                                                                                                | q    | Softwareerfahrung                                                                                                                                     | q    |

|      |                                                                                                                                       |      |                                                                                                    |         |                                                                                                     |      |
|------|---------------------------------------------------------------------------------------------------------------------------------------|------|----------------------------------------------------------------------------------------------------|---------|-----------------------------------------------------------------------------------------------------|------|
| 1597 | bessere Softwareerfahrung, Abschluss und Sprachen                                                                                     | q    | bessere Voraussetzungen laut KI bei Meyer                                                          | q       | mehr Berufserfahrung bei Ostermann                                                                  | q    |
| 1623 | Über Softwareerfahrung, Berufserfahrung und Abschluss hinweg gesehen mehr Punkte                                                      | q    | Mehr Sterne in Bezug auf Softwareerfahrung und Berufserfahrung                                     | q       | Über Softwareerfahrung, Berufserfahrung und Abschluss hinweg gesehen mehr Punkte                    | q    |
| 1625 | soziale skills hier nicht so wichtig, in anderen Kategorien war sie besser                                                            | q    | Softwareerfahrung wichtiger als soziale Skills                                                     | q       | Softwareerfahrung am wichtigsten                                                                    | q    |
| 1639 | Sprache und Abschluss höher eingestuft                                                                                                | q    | Sprache einen Stern mehr, insgesamt ausgeglichene Profil                                           | q       | Hoher Abschluss, bessere Sprachkenntnisse                                                           | q    |
| 1643 | Höhere Werte in Software- & Berufserfahrung                                                                                           | q    | Höherer Wert in Softwareerfahrung                                                                  | q       | Höherer Wert in Softwareerfahrung                                                                   | q    |
| 1651 | mehr oder minder gleichwertige qen - Frau vorgezogen.                                                                                 | q, e | höhere Softwareerfahrung - kommt schneller rein                                                    | q       | mehr Berufserfahrung                                                                                | q    |
| 1658 | Soziale Fähigkeiten nicht stark gefragt, deswegen mehr Wert auf Erfahrung und Umgang mit Computern!                                   | q    | Höhere Sprachkenntnisse und besserer Gesamtabschnitt!                                              | q       | Höhere Berufserfahrung!                                                                             | q    |
| 1673 | Soziale Skills müssen nicht unbedingt hervorragend sein. Wichtiger ist der Abschluss und Softwareerfahrung i. V. mit Berufserfahrung. | q    | Bei gleicher Berufserfahrung ist der gute Abschluss hier wichtiger als Softwareerfahrung.          | q       | Leichte Tendenz aufgrund des Abschlusses, aber sonst relativ ausgewogen.                            | q    |
| 1674 | bisher weniger Berufserfahrung dafür mehr softwareerfahrung und guten Abschluss kann sich als schnelle neues aneignen                 | q    | sehr viel Erfahrung inklusive gutem Abschluss, soziale Skills für die Position weniger wichtig     | q       | sehr guter Abschluss, schon softwareerfahrung.                                                      | q    |
| 1683 | Bauchgefühl                                                                                                                           | o    | Erfahrung                                                                                          | q       | Abschluss und Softwareerfahrung                                                                     | q    |
| 1689 | besserer Abschluss und mehr Softwareerfahrung                                                                                         | q    | besserer Abschluss und etwas jünger                                                                | q, a    | besserer Abschluss                                                                                  | q    |
| 1692 | Hier waren auch Abschluss und Softwareerfahrung entschieden, ansonsten schwere Entscheidung in diesem Fall.                           | q    | Auch hier eher Gleichstand, deswegen für den Bewerber mit besseren Social Skills entschieden .     | q       | Trotz weniger Berufserfahrung bessere Softwareerfahrung.                                            | q    |
| 1708 | Weiblich, Abschluss, Softwareerfahrung                                                                                                | q, g | besserer Abschluss, gleich hohe Berufserfahrung                                                    | q       | Berufserfahrung, Soziale Skills                                                                     | q    |
| 1739 | Mehr Punkte                                                                                                                           | x    | Ausgeglicheneres Profil                                                                            | q       | Bei ähnlichen qen Bevorzugung von Frauen                                                            | q, e |
| 1741 | etwas mehr Berufserfahrung                                                                                                            | q    | mehr Softwareerfahrung                                                                             | q       | beide ähnlich gut                                                                                   | q    |
| 1753 | mehr Softwareerfahrung                                                                                                                | q    | mehr Softwareerfahrung                                                                             | q       | mehr Berufserfahrung                                                                                | q    |
| 1764 | Etwas bessere Fachqualifikation                                                                                                       | q    | Männlich                                                                                           | g       | Bessere Fachqualifikation                                                                           | q    |
| 1773 | Beide gleich, 5-Sterne-Bewertung sieht besser aus.                                                                                    | o    | relativ gleich verteilt, aber Softwareerfahrung wichtiger als Soziale Skills.                      | q       | Sprache und Abschluss gleichen Berufserfahrung aus. Softwareerfahrung wichtiger als Soziale Skills. | q    |
| 1774 | Berufserfahrung zählt mehr und Schwäche in Softwareerfahrung wird durch hohe Soziale Skills ausgeglichen                              | q    | mehr Softwareerfahrung                                                                             | q       | mehr Softwareerfahrung und besserer Abschluss                                                       | q    |
| 1796 | hat bei Kombi aus Berufserfahrung & Sozialen skills insgesamt mehr Sterne als Katharina Decker                                        | q    | besserer Abschluss und mehr soziale Skills - ist eine Frau -> bisher wurden mehr Männer eingeladen | q, e, g | mehr Berufserfahrung und soziale Skills & weiblich                                                  | q, g |

|      |                                                                                                                             |   |                                                                                                   |         |                                                             |   |
|------|-----------------------------------------------------------------------------------------------------------------------------|---|---------------------------------------------------------------------------------------------------|---------|-------------------------------------------------------------|---|
| 1802 | soziale Skills und Softwarereferahrung als Schlüsselqualifikation höher                                                     | q | bessere Verteilung der wichtigen qen                                                              | q       | bessere soziale Skills und Softwarereferahrung              | q |
| 1803 | Abschluss ist besser                                                                                                        | q | Soziale Skills > Softwareentwicklung                                                              | q       | besserer Abschluss                                          | q |
| 1825 | super soziale Skills und Berufserfahrung ist auch gut. Softwareerfahrung soll mittels training on the job verbessert werden | q | super Abschluss, Berufserfahrung, Soziale Skills. Softwareerfahrung soll im Job verbessert werden | q       | Mehr Berufserfahrung und mehr soziale Skills                | q |
| 1826 | Mehr berufserfahrung und gute soziale Skills und bessere softwareerfahrung                                                  | q | bessere soziale skills                                                                            | q       | mehr berufserfahrung                                        | q |
| 1848 | In Sozialem deutlich überlegen, Softwareerfahrung lässt sich nachholen, Rest ist Mittelfeld, ähnlich wie bei Decker.        | q | Geben sich im Ganzen nicht viel. Ältere Frauen sollten unterstützt werden.                        | q, e, g | Soziale Skills sind schwerer zu gewichten als der Abschluss | q |
| 1854 | Bauchgefühl besser geeignet                                                                                                 | o | überall Top                                                                                       | q       | Berufserfahrung genauso wichtig wie Abschluss               | q |

**Table C2** Candidate Selection Reasons of Participants in Condition 2

| ID                         | Reason 1                                                                                        | C    | Reason 2                                                                                          | C | Reason 3                                               | C |
|----------------------------|-------------------------------------------------------------------------------------------------|------|---------------------------------------------------------------------------------------------------|---|--------------------------------------------------------|---|
| <b>Condition 2 – Job 1</b> |                                                                                                 |      |                                                                                                   |   |                                                        |   |
| 1344                       | Mehr Berufserfahrung; mehr Programmiererfahrung                                                 | q    | Mehr soziale Skills                                                                               | q | bessere Programmiererfahrung und besserer Abschluss    | q |
| 1354                       | Programmiererfahrung, Soziale Skills, Berufserfahrung                                           | q    | Programmiererfahrung                                                                              | q | Programmiererfahrung & soziale Skills                  | q |
| 1355                       | er hat mehr Programmiererfahrung und auch Berufserfahrung was hier sehr wichtig ist             | q    | mehr Programmiererfahrung; Social Skills sind meines Erachtens in diesem Bereich nicht so wichtig | q | Berufserfahrung                                        | q |
| 1370                       | Programmiererfahrung                                                                            | q    | Programmiererfahrung                                                                              | q | Programmiererfahrung                                   | q |
| 1397                       | Überzeugt durch bessere Programmierführung                                                      | q    | Gute Programmierführung                                                                           | q | Überzeugt durch Soziale Skills und Programmierführung. | q |
| 1401                       | Mehr Berufserfahrung, sonst meist identisch. Viele Sprachen sind für den Beruf nicht bedeutsam. | q    | Programmiererfahrung                                                                              | q | Abgesehen von Sprachen meist besser                    | q |
| 1421                       | Programmieren und Berufserfahrung                                                               | q    | Ausbildung und Programmieren                                                                      | q | Abschluss, Programmieren                               | q |
| 1422                       | Mehr Erfahrung und Programmierskills                                                            | q    | Abschluss besser und Programmierskills                                                            | q | Programmiererfahrung höher                             | q |
| 1450                       | berufserfahrung & programmiererfahrung                                                          | q    | ratio programmiererfahrung und social skills                                                      | q | berufserfahrung                                        | q |
| 1470                       | mehr programierungserfahrung                                                                    | q    | besseres profil insgesamt                                                                         | q | erfahrung , sozial und programmiererfahrung besser     | q |
| 1492                       | Zwar Türke aber dennoch mehr IT-Erfahrung.                                                      | q, r | Frau ist immer gut für die Teamwork.                                                              | g | keine Angabe                                           | q |
| 1511                       | Kandidat scheint besser zu sein                                                                 | o    | Subjektiv besser                                                                                  | o | Kandidatin passt besser in die Stellenbeschreibung     | o |
| 1517                       | Berufserfahrung über Abschluss                                                                  | q    | Bessere Verteilung der Skills                                                                     | q | Verteilung der Skills                                  | o |

|      |                                                                                                                                                        |   |                                                                                                                                  |         |                                                                                                                   |   |
|------|--------------------------------------------------------------------------------------------------------------------------------------------------------|---|----------------------------------------------------------------------------------------------------------------------------------|---------|-------------------------------------------------------------------------------------------------------------------|---|
| 1525 | Mehr Berufs und Programmierfahrung                                                                                                                     | q | Mehr Berufserfahrung und Soziale Skills                                                                                          | q       | Mehr Berufserfahrung und sprachliche Kenntnisse                                                                   | q |
| 1530 | Berufserfahrung und Programmierung                                                                                                                     | q | Soziale skills                                                                                                                   | q       | Soziale Skills und Programmierfahrung                                                                             | q |
| 1541 | Mehr Programmierfahrung und Berufserfahrung.                                                                                                           | q | Durchschn. bessere Kompetenzen.                                                                                                  | q       | Mehr Programmierfahrung.                                                                                          | q |
| 1548 | bessere Programmierfahrung                                                                                                                             | q | bessere Programmierfahrung und Sprachen                                                                                          | q       | sehr ähnlich: bessere Programmierfahrung                                                                          | q |
| 1568 | höhere Programmierfahrung wichtig ansonsten sehr vergleichbar                                                                                          | q | soziale Skills besser, das ist wichtig Programmierfahrung nur gering schlechter, trotzdem auf mittelmäßigem Niveau               | q       | Die Bewerberin ist in sozialen Skills und Programmierfahru gn gut ausgestattet. Auch mehr Berufserfahrung.        | q |
| 1576 | Bessere Sprachkenntnisse                                                                                                                               | q | Limitierte Soziale Skills und Berufserfahrung                                                                                    | q       | Bessere Sprache und Berufserfahrung                                                                               | q |
| 1590 | Berufserfahrung, Programmierfahrung                                                                                                                    | q | Soziale Skills --> wichtig für Kommunikation mit Belegschaft, Berufserfahrung                                                    | q       | bessere Sprachkenntnisse, höhere Erfahrungen                                                                      | q |
| 1611 | Programmier- und Berufserfahrung                                                                                                                       | q | Berufserfahrung und soziale Skills                                                                                               | q       | ein gewisses Sprachniveau hier schon wichtig                                                                      | q |
| 1622 | ist besser                                                                                                                                             | o | wirkt kompetenter                                                                                                                | q       | ist besser                                                                                                        | q |
| 1632 | Berufserfahrung wichtig für Unterstützung der restlichen Belegschaft                                                                                   | q | höhere Berufserfahrung, soziale Skills wichtig im Umgang mit anderen Mitarbeitern                                                | q       | gute Sprachkenntnisse erforderlich, um Mitarbeiters weiterhelfen zu können                                        | q |
| 1636 | mehr Programmierfahrung                                                                                                                                | q | seine sozialen Fähigkeiten sind besser                                                                                           | q       | Sozialkompetenz und Programmierfahrung                                                                            | q |
| 1644 | höhere Programmierfahrung                                                                                                                              | q | social Skills + programmier Erfahrung höher und wichtiger --> Gesamtpaket                                                        | q       | sonst Sprachbarrieren                                                                                             | q |
| 1653 | höhere Programmierfahrung                                                                                                                              | q | sehr guter Abschluss und Programmierfah rung                                                                                     | q       | Programmierfahrung und Abschluss besser, auch wenn Berufserfahrung geringer                                       | q |
| 1660 | Insgesamt haben die Bewerber gleich viele Sterne, der gewählte hat mehr bei Programmierfahrung, was ich für relevanter für den Job halte als Sprachen. | q | Beide haben gleich viele Sterne, Frauen sind in technischen Jobs unterrepräsentiert - bei gleicher q wähle ich deshalb die Frau. | q, e, g | Soziale Skills und Programmierfahrung finde ich wichtiger für den Job als Sprache und allgemeine Berufserfahrung. | q |
| 1672 | Geringere Sprachen und Abschluss, dafür mehr Berufs- und Programmierfahrung                                                                            | q | Größere Sprach- und Programmierfähigkeiten                                                                                       | q       | ebenfalls besseres Gesamtpaket; Berufserfah rung wird mit der Zeit kommen                                         | q |
| 1675 | Programmierfahrung ist besser ausgebaut                                                                                                                | q | Schwerpunkt liegt auf Sozialen Skills und Programmierfahrung. Dies ist vermutlich wichtig bei dem Beruf.                         | q       | Soziale Skills und Programmierfahrung sind sehr gut ausgeprägt.                                                   | q |
| 1685 | Mehr Soziale Skills, Programmierfahrung und Berufserfahrung                                                                                            | q | Mehr soziale Skills und Berufserfahrung                                                                                          | q       | Mehr Berufserfahrung, besser in Sprachen                                                                          | q |
| 1688 | bessere Programmier- und Berufserfahrung                                                                                                               | q | höhere Programmierfahrung                                                                                                        | q       | bessere Programmierfahrung                                                                                        | q |
| 1691 | Mehr Berufserfahrung                                                                                                                                   | q | Stärke im Programmieren                                                                                                          | q       | Bessere q                                                                                                         | q |
| 1718 | ist besser                                                                                                                                             | o | Die ist qualifizierter                                                                                                           | o       | wirkt allgemein besser                                                                                            | o |
| 1745 | Mustafa Özdemir hat mehr Berufs- und Programmierfahrung                                                                                                | q | Stephanie Jung hat mehr Berufserfahrung, soft skills und Programmierfahrung, die für diese Ausschreibung relevant sind.          | q       | Miray Korkmar hat einen besseren Abschluss                                                                        | q |
| 1746 | Programmierkenntnisse und Berufserfahrung                                                                                                              | q | Abschluss und Berufserfahrung                                                                                                    | q       | Sprachen ist sehr ungenau, aber ein Stern lässt nichts Gutes vermuten. Englisch sollte schon drin sein.           | q |

|                            |                                                                                                                       |   |                                                                                                                                                                                                                                                                                                                            |      |                                                                                                                                                                                                                                                                                                        |   |
|----------------------------|-----------------------------------------------------------------------------------------------------------------------|---|----------------------------------------------------------------------------------------------------------------------------------------------------------------------------------------------------------------------------------------------------------------------------------------------------------------------------|------|--------------------------------------------------------------------------------------------------------------------------------------------------------------------------------------------------------------------------------------------------------------------------------------------------------|---|
| 1757                       | Mehr BE und mehr Programmiererfahrung.                                                                                | q | mehr Programmiererfahrung, besserer Abschluss                                                                                                                                                                                                                                                                              | q    | Ausgewogener                                                                                                                                                                                                                                                                                           | q |
| 1768                       | Gesamtpaket besser                                                                                                    | o | Programmieren kann man lernen                                                                                                                                                                                                                                                                                              | o    | sprache und Berufserfahrung vorn Programmieren                                                                                                                                                                                                                                                         | q |
| 1770                       | Berufserfahrung und Programmiererfahrung besser bei gleichen sozialen Skills                                          | q | Deutlich bessere soziale Skills für anwenderspezif. Fragestellungen wichtig                                                                                                                                                                                                                                                | q    | Schwierig, annähernd gleich. Bessere Programmiererfahrung war ausschlaggebend, Sprachen und Berufserfahrung kann noch wachsen.                                                                                                                                                                         | q |
| 1780                       | mehr Programmierskills                                                                                                | q | mehr IT Skills                                                                                                                                                                                                                                                                                                             | q    | überall besser außer in Sprachen, was nicht wichtig ist                                                                                                                                                                                                                                                | q |
| 1791                       | Viel Berufserfahrung                                                                                                  | q | Frau Sahin hat zu wenig Berufserfahrung                                                                                                                                                                                                                                                                                    | q    | Berufserfahrung, soziale Skills                                                                                                                                                                                                                                                                        | q |
| 1806                       | Praktische Erfahrung in diesem Bereich wichtiger als Abschluss                                                        | q | Bereits mehr Berufserfahrung und Programmiererfahrung                                                                                                                                                                                                                                                                      | q    | sehr starke Programmiererfahrung                                                                                                                                                                                                                                                                       | q |
| 1817                       | höhere Programmiererfahrung und höhere Berufserfahrung sehe ich als wichtige Kriterien an für die IT-Administration   | q | Programmiererfahrung und Berufserfahrung sind vergleichbar (Achtung, Rechtschreibfehler : Programmierfahung) bei beiden BewerberInnen; den Ausschlag für S. Jung gab die höheren sozialen Skills, die bei der Unterstützung der Belegschaft bei anwenderspezifischen Fragestellungen für mich ein wichtiges Kriterium sind | q    | Programmiererfahrung als oberste Priorität ist leicht erhöht. Beide Bewerberinnen sind gleich jung, daher ist die Berufserfahrung etwas zu vernachlässigen. Leicht höherer Abschluss könnte eventuell mehr Potential entfalten in Ausübung dieser Stelle. Soziale Skills sind gleich stark ausgeprägt. | q |
| 1823                       | Berufserfahrung & Programmiererfahrung wichtiger als Abschluss in Anwendungsbezogenem Bereich                         | q | soziale skills wichtig wegen Interaktion mit Belegschaft, Sprachen scheinen generell weniger wichtig                                                                                                                                                                                                                       | q    | mehr Berufserfahrung - Sprache scheint wichtig wegen Intraaktion mit Belegschaft                                                                                                                                                                                                                       | q |
| 1828                       | Programmiererfahrung, Sprache                                                                                         | q | Sprache, Programmiererfahrung                                                                                                                                                                                                                                                                                              | q    | Sprachen, Berufserfahrung                                                                                                                                                                                                                                                                              | q |
| 1830                       | Mehr Berufs- und Porgrammiererfahrung                                                                                 | q | Social Skills besser für die Zusammenarbeit mit Belegschaft                                                                                                                                                                                                                                                                | q    | mehr Berufserfahrung                                                                                                                                                                                                                                                                                   | q |
| 1850                       | höherer Abschluss und höhere q in Sprachen, könnte bei Serveradministration von Kunden wichtig sein für den Austausch | q | mehr Programmiererfahrungen und qen in Sprachen                                                                                                                                                                                                                                                                            | q    | mehr sprachliche q bei gleichen sozialen Skills                                                                                                                                                                                                                                                        | q |
| 1851                       | Mehr Berufs- und Programmiererfahrung.                                                                                | q | Große Programmiererfahrung und besserer Abschluss.                                                                                                                                                                                                                                                                         | q    | Eigenschaften besser bewertet als bei Konkurrenz                                                                                                                                                                                                                                                       | q |
| <b>Condition 2 – Job 2</b> |                                                                                                                       |   |                                                                                                                                                                                                                                                                                                                            |      |                                                                                                                                                                                                                                                                                                        |   |
| 1344                       | mehr Berufserfahrung                                                                                                  | q | besseres Gesamtbild                                                                                                                                                                                                                                                                                                        | o    | bessere Kommunikationsfähigkeit                                                                                                                                                                                                                                                                        | q |
| 1354                       | Soziale Skills & Berufserfahrung                                                                                      | q | Soziale Skills & Alter                                                                                                                                                                                                                                                                                                     | q, a | Allroundpaket                                                                                                                                                                                                                                                                                          | o |
| 1355                       | Berufserfahrung und soziale Skills                                                                                    | q | Methodenkompetenz und Berufserfahrung                                                                                                                                                                                                                                                                                      | q    | Methodenkompetenz                                                                                                                                                                                                                                                                                      | q |
| 1370                       | Methodenkompetenz                                                                                                     | q | Alter, aber schlechte Methodenkompetenz, unsicher                                                                                                                                                                                                                                                                          | q, a | Methodenkompetenz                                                                                                                                                                                                                                                                                      | q |
| 1397                       | Überzeugt durch Berufserfahrung, Soziale Skills und Methodenkompetenz                                                 | q | Überzeugt durch Soziale Skills, Berufserfahrung. Relativ jung, Kompetenzen können gut weiter ausgebaut werden.                                                                                                                                                                                                             | q, a | Wesentlich besser Methodenkompetenz                                                                                                                                                                                                                                                                    | q |
| 1401                       | Soziale Skills bei der Stelle wichtig                                                                                 | q | Soziale Skills wichtig + jünger                                                                                                                                                                                                                                                                                            | q, a | durchschnittlich besser                                                                                                                                                                                                                                                                                | q |

|      |                                                                                                                                                                                                                 |      |                                                                                                                                                                                                                   |      |                                                                                                                                  |   |
|------|-----------------------------------------------------------------------------------------------------------------------------------------------------------------------------------------------------------------|------|-------------------------------------------------------------------------------------------------------------------------------------------------------------------------------------------------------------------|------|----------------------------------------------------------------------------------------------------------------------------------|---|
| 1421 | gute Sozialkompetenz in Verbindung mit Berufserfahrung, dabei ausreichend Methodenkompetenz                                                                                                                     | q    | die Mischung aus alter, Berufserfahrung, Sozial Skills und Methodenkompetenz                                                                                                                                      | q, a | hohe Methodenkompetenz                                                                                                           | q |
| 1422 | besserer Abschluss und Methodenkompetenz                                                                                                                                                                        | q    | Mehr Berufserfahrung und Methodenkompetenz                                                                                                                                                                        | q    | Mehr Methodenkompetenz und Berufserfahrung                                                                                       | q |
| 1450 | rundum gut, jünger                                                                                                                                                                                              | q, a | jünger und gutes Profil                                                                                                                                                                                           | q, a | methoden                                                                                                                         | q |
| 1470 | der bewerber ist jünger                                                                                                                                                                                         | a    | bewerber ist jünger                                                                                                                                                                                               | q, a | insgesamt besser                                                                                                                 | o |
| 1492 | Gute Skills in den wichtigen Bereichen.                                                                                                                                                                         | q    | Bessere Bewertungen.                                                                                                                                                                                              | o    | Durchschnittlich stabil.                                                                                                         | o |
| 1511 | Anderer ist eventuell schon zu alt, um zukunftsorientiert zu handeln                                                                                                                                            | q    | Kandidatin scheint besser zu sein (Soziale Skills), scheint jung und dynamisch                                                                                                                                    | q, a | subjektiv besser                                                                                                                 | o |
| 1517 | Mehr Berufserfahrung soziale skills                                                                                                                                                                             | q    | Alter und Abschluss                                                                                                                                                                                               | q, a | Skills besser verteilt, Sprachen weniger wichtig                                                                                 | q |
| 1525 | Mehr Berufserfahrung und soziale Skills                                                                                                                                                                         | q    | Soziale Skills wichtig                                                                                                                                                                                            | q    | Hohe Methodenkompetenz                                                                                                           | q |
| 1530 | Berufserfahrung und soziale skills                                                                                                                                                                              | q    | Soziale skills gekoppelt mit Berufserfahrung                                                                                                                                                                      | q    | Methodenkompetenz und Berufserfahrung                                                                                            | q |
| 1541 | Soziale Skills und Erfahrung.                                                                                                                                                                                   | q    | Fehlende Kompetenzen sind erlernbar.                                                                                                                                                                              | q    | Hohe Methodenkompetenz.                                                                                                          | q |
| 1548 | Verteilung des Könnens(Sterne) ist besser verteilt                                                                                                                                                              | q    | sehr ähnlich, deswegen Fokus auf Abschluss und Berufserfahrung gelegt                                                                                                                                             | q    | besser in Methodenkompetenz                                                                                                      | q |
| 1568 | viel Berufserfahrung und soziale Skills. Lediglich die Methodenkompetenz ist marginal schlechter                                                                                                                | q    | Die Methodenkompetenz ist besser. Die sozialen Skills sind nicht so hoch, jedoch kann viel Berufserfahrung hilfreich sein                                                                                         | q    | vergleichbare soziale Skills, aber höhere Methodenkompetenz und Berufserfahrung                                                  | q |
| 1576 | Soziale Skills sind als Projektleiter wichtig                                                                                                                                                                   | q    | Mehr Berufserfahrung                                                                                                                                                                                              | q    | Ausgeglicheneres Profil                                                                                                          | q |
| 1590 | hohe Berufserfahrung --> Mehrwert für junge Mitarbeiter, hohe soziale Skills --> nützlich um Erfahrung zu vermitteln                                                                                            | q    | bessere Sprachkenntnisse und Berufserfahrung sowie Methodenkompetenz                                                                                                                                              | q    | hohe Sprachkenntnisse, soziale Skills ermöglichen gute Kommunikation unter Mitarbeitern, methodenkompetenz muss ausgebaut werden | q |
| 1611 | bessere Methodenkompetenz bei mehr Berufserfahrung, jünger                                                                                                                                                      | q, a | gute soziale Skills, jünger                                                                                                                                                                                       | q, a | hauptsächlich wegen Methodenkompetenz                                                                                            | q |
| 1622 | wirkt geeigneter für den job                                                                                                                                                                                    | o    | soziale Skills wichtig, die andere ist zu alt                                                                                                                                                                     | q, a | wirkt besser                                                                                                                     | o |
| 1632 | geringerer Abschluss wird durch sehr hohe Berufserfahrung ausgeglichen                                                                                                                                          | q    | höhere Berufserfahrung und Methodenkompetenz                                                                                                                                                                      | q    | gute Methodenkompetenz                                                                                                           | q |
| 1636 | bessere soziale Kompetenz und Erfahrung                                                                                                                                                                         | q    | bessere Fähigkeiten                                                                                                                                                                                               | q    | bessere Fähigkeiten                                                                                                              | q |
| 1644 | Berufserfahrung + social skills                                                                                                                                                                                 | q    | fast identisch                                                                                                                                                                                                    | o    | Methodenkompetenz                                                                                                                | q |
| 1653 | Allrounder, besonders mit hohen sozialen Skills                                                                                                                                                                 | q    | Allrounder                                                                                                                                                                                                        | o    | Zwar weniger soziale Skills, jedoch sollte ein Mindestmaß an Methodenkompetenz vorhanden sein                                    | q |
| 1660 | Insgesamt vergleichbare Bewertung, der Bewerber hat aufgrund seines Alters womöglich keinen modernen Abschluss, dafür ausgewogen hohe Kompetenz in den letzten drei Feldern, die mir am wichtigsten erscheinen. | q, a | Die Bewerberin ist im Vergleich jünger, die Methodenkompetenz relativ leicht zu erwerben. Insgesamt ist die q gleich, diese Bewerberin hat Ausbaupotenzial in den schneller und leichter zu schulenden Bereichen. | q, a | Insgesamt vergleichbare Bewertung, der gewählte Bewerber hat ein ausgewogeneres Kompetenzprofil.                                 | q |
| 1672 | mehr erfahrung, besser im sozialen                                                                                                                                                                              | q    | sozial stärker, leicht höherer abschluss                                                                                                                                                                          | q    | mehr erfahrung und kompetenzen bei gleichwertigem abschluss                                                                      | q |

|      |                                                                                                                     |   |                                                                                                                                                                                                                                             |      |                                                                                                                                                                    |      |
|------|---------------------------------------------------------------------------------------------------------------------|---|---------------------------------------------------------------------------------------------------------------------------------------------------------------------------------------------------------------------------------------------|------|--------------------------------------------------------------------------------------------------------------------------------------------------------------------|------|
| 1675 | Soziale Kompetenz ist in diesem Berufsfeld wichtig.                                                                 | q | Der Altersunterschied war sehr hoch und der Beruf erfordert wahrscheinlich hohen Einarbeitungsaufwand.                                                                                                                                      | q, a | Die Methodenkompetenz des anderen Bewerbers ist zu gering                                                                                                          | q    |
| 1685 | mehr Berufserfahrung und Soziale Skills                                                                             | q | jünger, Defizite noch erlernbar (so wie Methodenkompetenz)                                                                                                                                                                                  | q, a | Mehr Berufserfahrung und Methodenkompetenz                                                                                                                         | q    |
| 1688 | hohe Berufserfahrung und gute soziale Skills                                                                        | q | höhere soziale Skills                                                                                                                                                                                                                       | q    | höhere Berufserfahrung und Methodenkompetenz                                                                                                                       | q    |
| 1691 | Berufserfahrung super                                                                                               | q | Bessere sozial skills                                                                                                                                                                                                                       | q    | bessere Methodenkompetenz                                                                                                                                          | q    |
| 1718 | sind beide ähnlich gut                                                                                              | o | andere ist vielleicht zu alt für den job, würde ich eher nicht einstellen                                                                                                                                                                   | q, a | wirkt besser als der andere                                                                                                                                        | o    |
| 1745 | Thomas Ackermann hat mehr Erfahrung in allen wichtigen Skills (Berufserfahrung, soziale Skills, Methodenkompetenz)  | q | Lisa Schaefer hat insgesamt das bessere Profil                                                                                                                                                                                              | o    | Martin Bach hat zwar weniger Methodenkompetenz, kann dies aber durch sein junges Alter aufholen                                                                    | q, a |
| 1746 | Methoden und Abschluss                                                                                              | q | Abschluss                                                                                                                                                                                                                                   | q    | Methodenkompetenz wichtig                                                                                                                                          | q    |
| 1757 | Ausgewogener                                                                                                        | o | Mehr Methodenkompetenz und Berufserfahrung.                                                                                                                                                                                                 | q    | Höhere Methodenkompetenz.                                                                                                                                          | q    |
| 1768 | Entwicklungsfähiger                                                                                                 | o | viel Erfahrung und gute Methodenkompetenz                                                                                                                                                                                                   | q    | hat potential                                                                                                                                                      | o    |
| 1770 | Schwierig - bessere Methodenkompetenz vs. weniger soziale Skills, knappe Entscheidung für die bessere Methodenkomp. | q | Soziale Skills deutlich vorne, im Rest mehr oder weniger ähnlich. Berufserfahrung immer noch ausbaufähig und damit auch Methodenkompetenz                                                                                                   | q    | Deutlich besser bei Berufserfahrung und Methodenkompetenz, Sprache nicht ganz so wichtig                                                                           | q    |
| 1780 | soziale skills besser                                                                                               | q | überall besser außer in sozialen skills                                                                                                                                                                                                     | q    | wirkt kompetenter                                                                                                                                                  | o    |
| 1791 | Berufserfahrung und soziale Skills helfen dem Team                                                                  | q | Methodenkompetenz kann man durch Zusammenarbeit mit anderen erlernen, soziale Kompetenz eher nicht                                                                                                                                          | q    | ausgeglichene Kompetenzen                                                                                                                                          | q    |
| 1806 | Bessere Mischung aus soft und hard skills                                                                           | q | soziale skills besser + in berufserfahrung hinterher weil deutlich jünger                                                                                                                                                                   | q    | Overall bessere Werte                                                                                                                                              | q    |
| 1817 | soziale Skills und Methodenkompetenz höher (7 Sterne vs 6 Sterne), dazu mehr Berufserfahrung.                       | q | soziale Skills und Methodenkompetenz sind insgesamt höher ausgeprägt. die niedrigere Berufserfahrung kann aufgrund des deutlich niedrigeren Alters der Bewerberin vernachlässigt werden, immerhin mit 3 von 5 Sternen überdurchschnittlich! | q, a | soziale Skills und Methodenkompetenz sind höher, dazu Berufserfahrung höher.                                                                                       | q    |
| 1823 | Soziale Skills bei Alternative deutlich schlechter                                                                  | q | trotz deutlich jünger ähnliche q + potenzial                                                                                                                                                                                                | q, a | hohe methodenkompetenz                                                                                                                                             | q    |
| 1828 | hohe soziale Skills und mehr Berufserfahrung                                                                        | q | deutlich mehr soziale Skills und höherer Abschluss                                                                                                                                                                                          | q    | deutlich! höhere Methodenkompetenz                                                                                                                                 | q    |
| 1830 | Abschluss und Methodenkompetenz                                                                                     | q | Abschluss, Berufserfahrung Methoden                                                                                                                                                                                                         | q    | Berufserfahrung Methode                                                                                                                                            | q    |
| 1850 | Etwas weniger Methodenkompetenz, dafür deutlich höhere soziale Skills und mehr Berufserfahrung                      | q | auch hier wieder deutlich mehr soziale Skills bei ähnlicher Berufserfahrung und Medienkompetenz                                                                                                                                             | q    | Zwar deutlich weniger soziale Skills als anderer Bewerber, aber anderer Bewerber hat kaum Methodenkompetenz, was als essentiell aus der Jobbeschreibung hervorgeht | q    |

|                            |                                                                                                                                            |         |                                                                                                                                                 |   |                                                                                                                      |      |
|----------------------------|--------------------------------------------------------------------------------------------------------------------------------------------|---------|-------------------------------------------------------------------------------------------------------------------------------------------------|---|----------------------------------------------------------------------------------------------------------------------|------|
| 1851                       | Besserer Abschluss und Kompetenz                                                                                                           | q       | Etwas mehr Erfahrung und Kompetenz                                                                                                              | q | Mehr Erfahrung und Kompetenz                                                                                         | q    |
| <b>Condition 2 – Job 3</b> |                                                                                                                                            |         |                                                                                                                                                 |   |                                                                                                                      |      |
| 1344                       | besseres Gesamtbild                                                                                                                        | o       | besseres Gesamtbild                                                                                                                             | o | mehr Erfahrung mit Software                                                                                          | q    |
| 1354                       | Abschluss & Softwareerfahrung                                                                                                              | q       | Abschluss, Berufserfahrung, soziale Skills                                                                                                      | q | Abschluss & Softwareerfahrung                                                                                        | q    |
| 1355                       | Softwareerfahrung und Abschluss                                                                                                            | q       | Softwareerfahrung wichtiger als soziale Skills                                                                                                  | q | Softwareerfahrung                                                                                                    | q    |
| 1370                       | Softwareerfahrung                                                                                                                          | q       | Softwareerfahrung                                                                                                                               | q | Softwareerfahrung                                                                                                    | q    |
| 1397                       | Im Durchschnitt besser. Der andere Bewerber hat nur durch seine Sozialen Skills überzeugt, die für die Buchhaltung nicht wesentlich sind.  | q       | Überzeugt durch Berufs- und Softwareerfahrung                                                                                                   | q | Durchschnittliche Berufs- und Softwareerfahrung                                                                      | q    |
| 1401                       | unsicher warum                                                                                                                             | o       | meist besser                                                                                                                                    | o | mehr Erfahrung                                                                                                       | q    |
| 1421                       | besserer Abschluss, Softwarekenntnis                                                                                                       | q       | Stimmiges gesamt Paket: guter Abschluss ausreichend Berufserfahrung, soziale Skills                                                             | q | Software, besserer Abschluss                                                                                         | q    |
| 1422                       | Soziale skills ausgeprägter                                                                                                                | q       | leicht bessere Schwerpunkte (Abschluss+soziale Skills)                                                                                          | q | Soziale Skills überzeugen                                                                                            | q    |
| 1450                       | software                                                                                                                                   | q       | insgesamt besser                                                                                                                                | o | softwareerfahrung                                                                                                    | q    |
| 1470                       | soziale skills im plus , sowie berufserfahrung                                                                                             | q       | hätte hier beide eingeladen, habe aber fr. richter wegen der sozialen skills letztendlich gewählt                                               | q | mehr berufserfahrung sowie sozial weiter                                                                             | q    |
| 1492                       | Social Skill Experten sind immer nützlich für das Unternehmen                                                                              | q       | Alles in allem ein Genie was seine Kompetenzen angeht. Das schmeckt.                                                                            | q | Eine Frau fehlt im Team                                                                                              | e, g |
| 1511                       | Kandidat ist besser                                                                                                                        | o       | Ist geeigneter                                                                                                                                  | o | Kandidat ist besser, bspw sind Social Skills nicht so wichtig                                                        | q    |
| 1517                       | Soziale skills höher                                                                                                                       | q       | Softwareerfahrung im Vergleich weniger wichtig                                                                                                  | q | Mehr Berufserfahrung und soziale Skills                                                                              | q    |
| 1525                       | Mehr Berufserfahrung und Soziale Skills                                                                                                    | q       | Mehr Softwareerfahrung                                                                                                                          | q | Mehr Berufserfahrung und Soziale Skills                                                                              | q    |
| 1530                       | Softwareerfahrung                                                                                                                          | q       | Soziale Skills und Berufserfahrung                                                                                                              | q | Soziale Skills und Berufserfahrung                                                                                   | q    |
| 1541                       | Besserer Abschluss und mehr Erfahrung mit Software. Berufserfahrung unterscheidet sich nicht wesentlich.                                   | q       | Mehr Softwareerfahrung.                                                                                                                         | q | Mehr Softwareerfahrung.                                                                                              | q    |
| 1548                       | Verteilung ausgeglichener                                                                                                                  | q       | mehr Softwareerfahrung                                                                                                                          | q | mehr soziale skills                                                                                                  | q    |
| 1568                       | guter Abschluss - Berufserfahrung kann noch gesammelt werden - Softwareerfahrung ist besser im Vergleich - soziale skills nicht so wichtig | q       | Der Bewerber hat zwar einen leicht schlechteren Abschluss, jedoch weist er bessere Softwareerfahrung auf. Soziale Skills sind nicht so relevant | q | Softwareerfahrung besser soziale Skills weniger wichtig der gute Abschluss kann ggf. die Berufserfahrung ausgleichen | q    |
| 1576                       | Bessere Softwareerfahrung                                                                                                                  | q       | Ein Abschluss alleine sagt nichts über die Fähigkeiten                                                                                          | q | Berufserfahrung kann erworben werden.                                                                                | o    |
| 1590                       | Soziale Skills, Berufserfahrung                                                                                                            | q       | Softwareerfahrung, Sprachen, Berufserfahrung                                                                                                    | q | höherer Abschluss, bessere Sprachkenntnisse, Software                                                                | q    |
| 1611                       | soziale Skills hier nicht so wichtig, ansonsten sehr ähnlich, aber Auswahl der Frau, da bis jetzt vor allem Männer genommen wurden         | q, g, e | sehr gute Bewertung außer in sozialen Skills, die hier nicht so wichtig sind                                                                    | q | ähnliche Bewertung, aber mehr Berufserfahrung + Frau                                                                 | q, g |
| 1622                       | ist kompetenter                                                                                                                            | o       | ist besser als die andere                                                                                                                       | o | ist besser für den job                                                                                               | o    |

|      |                                                                                                                                                                              |      |                                                                                                                                                                                                               |      |                                                                                                                                                                                                          |         |
|------|------------------------------------------------------------------------------------------------------------------------------------------------------------------------------|------|---------------------------------------------------------------------------------------------------------------------------------------------------------------------------------------------------------------|------|----------------------------------------------------------------------------------------------------------------------------------------------------------------------------------------------------------|---------|
| 1632 | zwar noch nicht so viel Berufserfahrung, aber kann dazulernen                                                                                                                | q    | Fokus auf Erfahrungen und Abschluss, Rest nicht von so hoher Relevanz bei Buchhaltung                                                                                                                         | q    | guter Abschluss aber wenig Berufserfahrung sieht danach aus, dass er gerade erst fertig geworden ist und nun erst in den Beruf einsteigt - noch lernfähig und formbar                                    | q, a    |
| 1636 | ausgewogenere Fähigkeiten                                                                                                                                                    | q    | bessere Fähigkeiten                                                                                                                                                                                           | o    | bessere Fähigkeiten                                                                                                                                                                                      | q       |
| 1644 | höhere Softwareerfahrung                                                                                                                                                     | q    | in mehreren Bereichen besser                                                                                                                                                                                  | q    | Höherer Abschluss + Softwareerfahrung                                                                                                                                                                    | q       |
| 1653 | Allrounder                                                                                                                                                                   | o    | da allgemein sehr hohe Werte können soziale Skills vernachlässigt werden                                                                                                                                      | q    | insgesamt besser geeignet, auch wenn geringe Berufserfahrung                                                                                                                                             | q       |
| 1660 | Gleich viele Sterne gesamt, wie bisher bei allen Bewerber:innen. Softwareerfahrung ist größer als beim Mitbewerber, Berufserfahrung zwar geringer, aber sie ist auch jünger. | q, a | Zwar gleich viele Sterne, aber mehr Softwareerfahrung.                                                                                                                                                        | q    | Nachdem ich nun einige Runden die sozialen Skills vernachlässigt habe, möchte ich auch eine:n Bewerber:in mit sehr guten Softskills im Verfahren. Insgesamt ist die q laut KI vergleichbar.              | q       |
| 1672 | besseres Gesamtpaket                                                                                                                                                         | o    | deutlich besseres Gesamtpaket                                                                                                                                                                                 | q    | höherer Abschluss, mehr Software erfahrung                                                                                                                                                               | q       |
| 1675 | Hoher Abschluss, aber eine geringere Berufserfahrung. Hier ist bestimmt Potenzial.                                                                                           | q    | Sehr breit aufgestellt. Vielseitig einsetzbar.                                                                                                                                                                | q    | Kompetenzen sind ausbaufähig, aber nicht schlechter als vom Bewerber. Da in der vorherigen Auswahl von mir mehr männliche Bewerber ausgewählt wurden, wähle ich in diesem Fall die weibliche Bewerberin. | q, e, g |
| 1685 | Mehr Softwareerfahrung, Allg. bessere Balance der Skills                                                                                                                     | q    | mehr Softwareerfahrung                                                                                                                                                                                        | q    | Mehr Softwareerfahrung                                                                                                                                                                                   | q       |
| 1688 | ebenfalls gute Abschlüsse und bessere Softwareerfahrung                                                                                                                      | q    | viel Berufserfahrung und bessere softwareskills                                                                                                                                                               | q    | hohe soziale Skills und mehr Berufserfahrung                                                                                                                                                             | q       |
| 1691 | Bessere sozial skills                                                                                                                                                        | q    | Ähnliche q                                                                                                                                                                                                    | q    | Mehr Softwareerfahrung                                                                                                                                                                                   | q       |
| 1718 | ist qualifizierter für den Job                                                                                                                                               | o    | wirkt kompetenter als die andere                                                                                                                                                                              | o    | Der Kandidat ist besser                                                                                                                                                                                  | o       |
| 1745 | Katharina Decker hat das ausgewogene Profil                                                                                                                                  | q    | Die Profile sind sich sehr ähnlich, aber das Profil von Karin Richter hat einen besseren Abschluss, während Arne Meyer bessere Sprachkenntnisse hat. Diese sind für die Stelle aber nicht von hoher Bedeutung | q    | Sophia Ostermann hat mehr soziale Skills und Berufserfahrung                                                                                                                                             | q       |
| 1746 | same                                                                                                                                                                         | x    | Soziale Skills unwichtig, Rest dann 50:50                                                                                                                                                                     | q    | Soziale Skills unwichtig, Rest dann 50:50                                                                                                                                                                | q       |
| 1757 | Ausgewogener und besserer Abschluss.                                                                                                                                         | q    | Skills sind ähnlich, bevorzuge die Frau                                                                                                                                                                       | q, g | Mehr Berufserfahrung                                                                                                                                                                                     | q       |
| 1768 | mehr Software Erfahrung - soziales nicht ganz so entscheidend                                                                                                                | q    | software erfahrung vor Soziale skills                                                                                                                                                                         | q    | kann sich sicherlich integrieren und so die software schwäche ausgleichen                                                                                                                                | o       |
| 1770 | Schwierig-annähernd gleich. Abschluss und Softwareerfahrung ausschlaggebend, Berufserfahrung kann noch kommen                                                                | q    | schwierig-annähernd gleich. Softwareerfahrung und Abschluss ausschlaggebend                                                                                                                                   | q    | Soziale Skills deutlich vorn.                                                                                                                                                                            | q       |
| 1780 | mehr Softwareerfahrung                                                                                                                                                       | q    | mehr Generalist als Karin                                                                                                                                                                                     | o    | höhere Abschluss                                                                                                                                                                                         | q       |
| 1791 | Soziale Skills, Softwareerfahrung kann man mit der Zeit aufbauen                                                                                                             | q    | soziale Skills sind wichtig - Frau Richter hat mehr zwischenmenschliche Kompetenz                                                                                                                             | q    | mehr Berufserfahrung                                                                                                                                                                                     | q       |
| 1806 | overall besseres Rating bis auf Berufserfahrung                                                                                                                              | q    | Fast gleiche Skills, Soziale Skills in dem Fall besser gewertet                                                                                                                                               | q    | mehr Berufserfahrung                                                                                                                                                                                     | q       |

|      |                                                                                           |   |                                                                                                                                                                                |   |                                                                                                        |   |
|------|-------------------------------------------------------------------------------------------|---|--------------------------------------------------------------------------------------------------------------------------------------------------------------------------------|---|--------------------------------------------------------------------------------------------------------|---|
| 1817 | Berufserfahrung, soziale Skills und Softwareerfahrung sind höher!                         | q | Ich habe mich verkliekt, ich wähle den 44-jährigen Bewerber aus Halberstadt aufgrund der höheren Softwareerfahrung aus, die in meinen Augen wichtiger sind als soziale Skills. | x | Berufserfahrung, soziale skills und Softwareerfahrung insgesamt höher ausgeprägt.                      | q |
| 1823 | ki                                                                                        | x | besserer Abschluss/ mehr Erfahrungen sprachen weniger wichtig bei Buchhaltung                                                                                                  | q | besser Abschluss, softwareerfahrung                                                                    | q |
| 1828 | Berufserfahrung, soziale Skills                                                           | q | Sprachen                                                                                                                                                                       | q | soziale Skills deutlich besser                                                                         | q |
| 1830 | Sprache Abschluss Software                                                                | q | Sprache, Software                                                                                                                                                              | q | Sprache Abschluss, Software                                                                            | q |
| 1850 | Zwar etwas geringere Softwareerfahrung, aber mehr Berufserfahrung und hohe soziale Skills | q | bei gleicher Berufserfahrung etwas mehr Softwareerfahrung und sprachliche Skills                                                                                               | q | Zwar etwas weniger Softwareerfahrung, dafür aber deutlich mehr soziale Skills und mehr Berufserfahrung | q |
| 1851 | Besserer Abschluss und Sprachkenntnisse                                                   | q | Etwas mehr Erfahrung                                                                                                                                                           | q | Soziale Skills viel besser bewertet.                                                                   | q |

**Table C3** Candidate Selection Reasons of Participants in Condition 3

| ID                         | Reason 1                                                                                                                                                                  | C | Reason 2                                                                                                                                                                                                                | C    | Reason 3                                                                                                                  | C    |
|----------------------------|---------------------------------------------------------------------------------------------------------------------------------------------------------------------------|---|-------------------------------------------------------------------------------------------------------------------------------------------------------------------------------------------------------------------------|------|---------------------------------------------------------------------------------------------------------------------------|------|
| <b>Condition 3 – Job 1</b> |                                                                                                                                                                           |   |                                                                                                                                                                                                                         |      |                                                                                                                           |      |
| 1341                       | besser in Programierung und mehr Berufserfahrung                                                                                                                          | q | Im Allgemeinen besser (mehr Sterne)                                                                                                                                                                                     | x    | besser in programierung und soziae skills                                                                                 | q    |
| 1342                       | Höhere Berufs- und Programmiererfahrung                                                                                                                                   | q | Soziale Skills                                                                                                                                                                                                          | q    | Ausgeprägte soziale und programmierskills                                                                                 | q    |
| 1362                       | Dieser Bewerber hat die höhere Programmiererfahrung, die Fähigkeit, die ich bei dieser Stelle als am wichtigsten empfinde. Zusätzlich bringt er viel Berufserfahrung mit. | q | Die Bewerberin hat sehr viel Programmiererfahrung, was hoffentlich ihre mangelnde Berufserfahrung ausgleicht. Ihre sozialen Skills sind nicht so hoch, was aber auch bei dieser Stelle nicht die höchste Priorität hat. | q    | Die Bewerberin hat sowohl Programmiererfahrung, als auch Berufserfahrung und außerdem hohe soziale Skills.                | q    |
| 1383                       | mehr Berufserfahrung und mehr Programmiererfahrung                                                                                                                        | q | mehr Berufserfahrung und mehr soziale Skills                                                                                                                                                                            | q    | ausgewogeneres Verhältnis zw. Berufserfahrung und Programmiererfahrungen                                                  | q    |
| 1385                       | deutsch                                                                                                                                                                   | r | deutsch                                                                                                                                                                                                                 | r    | weiblich deutsch                                                                                                          | r, g |
| 1405                       | Ich würde keinen Türken einladen                                                                                                                                          | r | Ich möchte einer Frau eine Chance geben und ich möchte keinen Türken einladen                                                                                                                                           | r, g | Eine Frau ist mir lieber, einen Türken würde ich nicht einladen                                                           | r, g |
| 1416                       | Bessere Programmiererfahrung P.S. Programmiererfahrung ist im Tool falsch geschrieben :)                                                                                  | q | Mehr Programmiererfahrung                                                                                                                                                                                               | q    | Programmiererfahrung                                                                                                      | q    |
| 1423                       | Mehr Erfahrung                                                                                                                                                            | q | Hat mehr Berufserfahrung und kann das Programmieren noch aufholen                                                                                                                                                       | q    | Im Prinzip würde ich hier beide einladen, da sie sich nicht viel geben. Die Kandidatin hat einen etwas besseren Abschluss | q    |
| 1445                       | mehr Berufserfahrung                                                                                                                                                      | q | mehr Berufserfahrung und Soziale Skills                                                                                                                                                                                 | q    | Berufserfahrung                                                                                                           | q    |
| 1457                       | Mehr Erfahrung und Skills                                                                                                                                                 | q | Höhere Programmiererfahrung und Social Skills                                                                                                                                                                           | q    | Mehr Berufserfahrung                                                                                                      | q    |
| 1474                       | Programmiererfahrung ist besser                                                                                                                                           | q | Mehr Sterne bei Soft-Skills, bei Programmiererfahrung sieht das auch nicht schlecht aus                                                                                                                                 | q    | Mehr Berufserfahrung                                                                                                      | q    |

|      |                                                                                      |      |                                                                                                                                                           |         |                                                                                                                                                                                                            |      |
|------|--------------------------------------------------------------------------------------|------|-----------------------------------------------------------------------------------------------------------------------------------------------------------|---------|------------------------------------------------------------------------------------------------------------------------------------------------------------------------------------------------------------|------|
| 1483 | Beruf- & Programmiererfahrung                                                        | q    | Programmiererfahrung                                                                                                                                      | q       | Soziale Skills, Programmiererfahrung                                                                                                                                                                       | q    |
| 1508 | Jünger                                                                               | a    | berufserfahren,                                                                                                                                           | q       | berufserfahren, jünger                                                                                                                                                                                     | q, a |
| 1518 | Kandidat 1 ist zu schlecht beim Programmieren.                                       | q    | Kandidatin 2 hat zwar mehr Programmierfah- rung, kann aber nicht mit anderen Leuten um- gehen. Deshalb trifft Kandidatin 1 eher die An- forderungen.      | q       | Beide Kandidaten sind geeignet, aber Kandida- tin 2 trifft mehr dem gesuchten Profil zu.                                                                                                                   | q    |
| 1522 | KI Empfehlung                                                                        | k    | Kandidatin sieht fähiger aus                                                                                                                              | o       | Ist besser                                                                                                                                                                                                 | o    |
| 1529 | Sehr ähnlich wieder, Diversitätsgründe                                               | q, e | Diversität                                                                                                                                                | e       | bisschen runderes Profil                                                                                                                                                                                   | o    |
| 1533 | Mehr Berufs-/Programmiererfahrung.                                                   | q    | Besserer Abschluss, mehr Programmi- ererfahrung.                                                                                                          | q       | Besserer Abschluss, mehr Programmiererfah- rung und nur ein Stern weniger bei Berufser- fahrung, daher vermutlich vergleichbar.                                                                            | q    |
| 1549 | besser qualifiziert                                                                  | q    | besser qualifiziert                                                                                                                                       | o       | ausgewogeneres Profil                                                                                                                                                                                      | o    |
| 1552 | In diesen Bereich ist Kommunikation und erforderliche berufliche Abschlüsse wichtig. | q    | Hier würde bevorzugt Teamarbeit und soziales Verhalten vorteilhaft sein                                                                                   | q       | Eine weibliche Person ist im Team kann das Gesamtklima auffrischen, Erfahrungen im Be- reich Programmierung ist gut, beim Mitbewer- ber muss die Sprache verbessert werden, viel- leicht im nächstem Jahr. | q, g |
| 1554 | Programmiererfahrung wichtig und etwas höher                                         | q    | gibt sicher wenig Frauen in diesem Bereich und Sozialkompetenz ist auch wichtig                                                                           | q, e, g | Berufserfahrung ist nicht so wichtig für mich, gute Punkte in den unteren Rubriken                                                                                                                         | q    |
| 1571 | Berufserfahrung                                                                      | q    | soziale Skills                                                                                                                                            | q       | soziale Skills und Programmiererfahrung                                                                                                                                                                    | q    |
| 1572 | mehr Programmiererfahrung                                                            | q    | Soziale Skills wichtig für Kontakt zu Beleg- schaft, restlichen Sterneunterschiede nicht zu signifikant                                                   | q       | vergleichbar mit andere Bewerberin, mehr Pro- grammiererfahrung                                                                                                                                            | q    |
| 1602 | mehr Programmiererfahrung                                                            | q    | mehr Programmiererfahrung, besserer Ab- schluss                                                                                                           | q       | besserer Abschluss und mehr Berufserfahrung                                                                                                                                                                | q    |
| 1621 | Hat einen besseren Abschluss und bessere Spracherfahrungen                           | q    | bessere Sprach-und Programmerfahrungen                                                                                                                    | q       | bessere Sprachkenntnisse                                                                                                                                                                                   | q    |
| 1631 | Relevante Fähigkeiten besser, zudem KI-Emp- fehlung                                  | q, k | Programmiererfahrung, Abschluss und Sprach- kenntnisse gut,zudem KI-Empfehlung                                                                            | q, k    | Programmiererfahrung und Abschluss besser, zudem KI-Empfehlung                                                                                                                                             | q, k |
| 1640 | Berufserfahrung und Diversity                                                        | q, e | soft skills                                                                                                                                               | q       | diversity                                                                                                                                                                                                  | e    |
| 1646 | Sehr Ausgewogen                                                                      | o    | gut in Soz. Skills und Programmieren, besser ausgewogen                                                                                                   | q       | Bessere Programmiererfahrung                                                                                                                                                                               | q    |
| 1657 | bessere Berufserfahrung - bessere Programmi- ererfahrung                             | q    | etwas schlechtere Programmier-, dafür bes- sere Berufserfahrung gleicht sich aus - deutli- cher Vorteil bei Sozialen Skills, wichtig für An- wenderfragen | q       | Sprache bei Kontrahent noch schlechter                                                                                                                                                                     | q    |
| 1661 | Hat mich mehr angesprochen                                                           | q    | Besserer Abschluss, mehr Programmi- ererfahrung                                                                                                           | q       | KI Empfehlung                                                                                                                                                                                              | k    |
| 1662 | KI und BE                                                                            | q, k | BE und weiblich im Team IT schadet nicht                                                                                                                  | q, g    | BE                                                                                                                                                                                                         | q    |
| 1678 | Mehr Programmiererfahrung und Berufserfahrung.                                       | q    | Bessere soziale Skills und etwas mehr Berufs- erfahrung.                                                                                                  | q       | Mehr Programmiererfahrung.                                                                                                                                                                                 | q    |

|      |                                                                                                                                                                                                                                                               |         |                                                                                                                                                              |      |                                                                                                                                                                                                                                           |         |
|------|---------------------------------------------------------------------------------------------------------------------------------------------------------------------------------------------------------------------------------------------------------------|---------|--------------------------------------------------------------------------------------------------------------------------------------------------------------|------|-------------------------------------------------------------------------------------------------------------------------------------------------------------------------------------------------------------------------------------------|---------|
| 1682 | Der Bewerber hat mehr Berufserfahrung und bessere Programmierkenntnisse.                                                                                                                                                                                      | q       | Die Bewerberin ist jünger, hat bessere Sprach- und Programmierkenntnisse. Als Einsteigerin hat sie noch weniger Berufserfahrung, das ist aber nicht schlimm. | q, a | Die Bewerberin hat besonders gute Social Skills und Programmiererfahrung.                                                                                                                                                                 | q       |
| 1687 | Kandidat hat mehr Berufs- und Programmiererfahrung.                                                                                                                                                                                                           | q       | Kandidatin hat mehr Berufserfahrung und deutlich bessere Soziale Skills. Fehlende Programmiererfahrungen könnten nachgeholt werden.                          | q    | In den Punkten Programmiererfahrung und Abschluss besser. Sprache und Berufserfahrung kann im Laufe der Zeit schnell nachgeholt werden.                                                                                                   | q       |
| 1696 | geringere Sterne bei Sprachen als bei dem Konkurrenzbewerber ist unter Umständen nicht schlimm, da Job keine großartigen Sprachkenntnisse verlangt - verlangt werden vielmehr Programmierkenntnisse und Berufserfahrung, diese sind bei Mustafa Özdemir höher | q       | Programmiererfahrungen scheinen sehr wichtig zu sein als IT-Administrator (vermute ich) - KI-Empfehlung                                                      | q, k | Unterschiede zwischen den Bewerbern sind nicht groß, maximal 1 Stern Abweichung je Kategorie (Sprachen, Abschluss usw..). Daher ist die Auswahl ohne Empfehlung recht schwierig. - KI-Empfehlung übernimmt hier die Entscheidung für mich | k       |
| 1710 | schwierige entscheidung keine klare präferenz                                                                                                                                                                                                                 | q       | soz skills                                                                                                                                                   | q    | stärkeres gesamt profil                                                                                                                                                                                                                   | o       |
| 1720 | Aufgrund der Programmier- und der Berufserfahrung                                                                                                                                                                                                             | q       | Programmiererfahrung Sprachen                                                                                                                                | q    | Solideres Gesampaket                                                                                                                                                                                                                      | o       |
| 1729 | Empfehlung                                                                                                                                                                                                                                                    | k       | Wirkt besser und qualifizierter                                                                                                                              | q    | ist besser                                                                                                                                                                                                                                | o       |
| 1749 | Bessere Berufs- und Programmiererfahrung. Interkulturell, daher Zugriff auf andere Ressourcen                                                                                                                                                                 | q, e, r | Bessere Kompetenzen, KI-Empfehlung                                                                                                                           | q, k | Bessere Programmiererfahrung und soziale Skills                                                                                                                                                                                           | q       |
| 1750 | Mehr Programmier- und Berufserfahrung                                                                                                                                                                                                                         | q       | Programmiererfahrung und Abschluss                                                                                                                           | q    | Mehr Programmiererfahrung                                                                                                                                                                                                                 | q       |
| 1759 | Berufserfahrung und Programmiererfahrung höher, bei gleichwertigen sozialen Skills                                                                                                                                                                            | q       | Indifferent; Verlass auf KI                                                                                                                                  | k    | höhere Programmiererfahrung bei gleichwertigen sozialen Skills                                                                                                                                                                            | q       |
| 1771 | Wegen der Berufserfahrung                                                                                                                                                                                                                                     | q       | Wegen der Programmierkenntnisse, Sprachen                                                                                                                    | q    | Frauenquote, guter Durchschnitt                                                                                                                                                                                                           | q, e, g |
| 1787 | besserer Abschluss                                                                                                                                                                                                                                            | q       | Sprachenskills könnten von Vorteil sein, mehr Programmiererfahrung                                                                                           | q    | Mehr Programmiererfahrung und besserer Abschluss                                                                                                                                                                                          | q       |
| 1795 | Sowohl mehr Programmier- als auch Berufserfahrung, was jobspezifisch wichtiger ist als die Höhe des Abschlusses und die sprachlichen Skills!                                                                                                                  | q       | Soziale skills sind weniger von Bedeutung, entscheidend ist die Programmiererfahrung. Deshalb vertraue ich hier der KI-Empfehlung.                           | q, k | In den für diesen Job wesentlichen Aspekten schneidet sie besser ab.                                                                                                                                                                      | q       |
| 1801 | Berufs- und Programmiererfahrung                                                                                                                                                                                                                              | q       | Bessere Mischung aus Skills                                                                                                                                  | q    | Sprachen                                                                                                                                                                                                                                  | q       |
| 1810 | Programmiererfahrung ist wichtiger als Sprachen zu können                                                                                                                                                                                                     | q       | Programmiererfahrung wichtigster Skill                                                                                                                       | q    | programmiererfahrung wichtiger als berufserfahrung                                                                                                                                                                                        | q       |
| 1811 | mehr Sterne bei Programmiererfahrung und Berufserfahrung                                                                                                                                                                                                      | q       | mehr Programmierer.                                                                                                                                          | q    | mehr Berufserfahrung und mehr Sprachen                                                                                                                                                                                                    | q       |
| 1824 | höhere programmier Erfahrung                                                                                                                                                                                                                                  | q       | zwar weniger programmier Erfahrung jedoch höhere soziale skills und höhere Berufserfahrung                                                                   | q    | höhere Berufserfahrung und soziale skills                                                                                                                                                                                                 | q       |
| 1832 | Ich war nicht ganz sicher, welche gen in der IT-Administration wirklich gefragt sind und welche vernachlässigbar sind. Grundsätzlich erschien                                                                                                                 | q, k    | Eine schwierige Entscheidung, da beide Schwächen aufweisen und die erste Kandidatin bei der Berufserfahrung überwiegt, die zweite                            | q    | Eine schwer Entscheidung, aber letztlich bin ich der Empfehlung der KI gefolgt, da die sprachlichen Fähigkeiten bei beiden ausbaufähig sind                                                                                               | q, k    |

|                            |                                                                                                                                                                                                                                                 |      |                                                                                                                                                                                                                                    |   |                                                                                                                                                                            |      |
|----------------------------|-------------------------------------------------------------------------------------------------------------------------------------------------------------------------------------------------------------------------------------------------|------|------------------------------------------------------------------------------------------------------------------------------------------------------------------------------------------------------------------------------------|---|----------------------------------------------------------------------------------------------------------------------------------------------------------------------------|------|
|                            | mir die Berufserfahrung wichtiger als der Abschluss, und die Programmierfähigkeiten wichtiger als die Sprache, daher habe ich mich dem Urteil der KI angeschlossen. Ist die Gewichtung andersherum, muss das Urteil natürlich angepasst werden. |      | jedoch bei der Programmiererfahrung. Ich habe schließlich beschlossen, die Programmiererfahrung höher zu bewerten, aber war mir nicht ganz sicher.                                                                                 |   | und somit Abschluss und Programmiererfahrung für Kandidatin 1 sprechen, und nur die Berufserfahrung für Kandidatin 2.                                                      |      |
| 1834                       | Programmierung                                                                                                                                                                                                                                  | q    | Berufserfahrung und Programmierung                                                                                                                                                                                                 | q | Berufserfahrung. und Programmierung                                                                                                                                        | q    |
| 1836                       | mehr Berufserfahrung, bessere Programmierkenntnisse                                                                                                                                                                                             | q    | mehr Berufserfahrung und viel mehr soziale Skills                                                                                                                                                                                  | q | mehr Berufserfahrung und sonst relativ ähnlich                                                                                                                             | q    |
| 1857                       | Für die Rolle ist Berufserfahrung und Programmiererfahrung wichtiger                                                                                                                                                                            | q    | fehlende Berufserfahrung könnte durch bessere Ausbildung kompensiert werden, Soziale skills sind auch wichtig - könnten bei der Rolle auch kontraproduktiv sein                                                                    | q | in etwa gleichwertig, entscheidend ist die etwas höhere Berufserfahrung                                                                                                    | q    |
| <b>Condition 3 – Job 2</b> |                                                                                                                                                                                                                                                 |      |                                                                                                                                                                                                                                    |   |                                                                                                                                                                            |      |
| 1341                       | Passt besser ins anforderungsprofil                                                                                                                                                                                                             | q    | mehr soziale skills und deutlich jünger                                                                                                                                                                                            | q | passt besser ins anforderungsprofil                                                                                                                                        | q    |
| 1342                       | Soziale Skills besser - Interessenkonflikte ect.                                                                                                                                                                                                | q    | Ausgewogenere Fähigkeiten                                                                                                                                                                                                          | o | Wichtigsten Skills für den Beruf vorhanden                                                                                                                                 | q    |
| 1362                       | Der Bewerber ist im den Bereichen Soziale Skills und Methodenkompetenz sehr gut und gut ausgebildet, zusätzlich bringt er viel Berufserfahrung mit.                                                                                             | q    | Die Bewerberin ist im Bereich Methodenkompetenz gut ausgebildet. Ihre sozialen Skills sind nicht so hoch, allerdings kann sie das ggf. mit ihrer hohen Berufserfahrung ausgleichen. Zusätzlich hat sie auch einen guten Abschluss. | q | Der Bewerber ist im Bereich Methodenkompetenz sehr gut ausgebildet, seine sozialen Skills sind noch ausbaufähig, aber er konnte bereits Berufserfahrung sammeln.           | q    |
| 1383                       | mehr Berufserfahrung und höhere soziale Skills                                                                                                                                                                                                  | q    | mehr Methodenkompetenz und mehr Berufserfahrung                                                                                                                                                                                    | q | mehr Berufserfahrung und mehr Methodenkompetenz                                                                                                                            | q    |
| 1385                       | jünger                                                                                                                                                                                                                                          | a    | berufserf                                                                                                                                                                                                                          | q | Kompetent                                                                                                                                                                  | o    |
| 1405                       | Thomas ist zu alt                                                                                                                                                                                                                               | a    | Monika ist zu alt                                                                                                                                                                                                                  | a | Patrick ist prompt einsetzbar                                                                                                                                              | o    |
| 1416                       | Methodenkompetenz und Social Skills besser                                                                                                                                                                                                      | q    | Methodenkompetenz besser                                                                                                                                                                                                           | q | Methodenkompetenz besser                                                                                                                                                   | q    |
| 1423                       | Die mangelnde Methodenkompetenz kann er sich sicher schnell aneignen, soziale Skills zu lernen ist ggf schwieriger                                                                                                                              | q    | Einfach erfahrener als andere Kandidatin. Trotz geringeren sozialen Skills, wäre wohl diese Person besser                                                                                                                          | q | Die schwierigste Wahl, da Kandidat alt. Aber der andere ist auch nicht optimal. Evtl gibt es einen besseren Kandidaten, wenn Patrick in Rente geht oder nach der Probezeit | q, a |
| 1445                       | Berufserfahrung, Soziale Skills                                                                                                                                                                                                                 | q    | Berufserfahrung, Methodenkompetenz                                                                                                                                                                                                 | q | Methodenkompetenz                                                                                                                                                          | q    |
| 1457                       | mehr Erfahrung                                                                                                                                                                                                                                  | q    | mehr Erfahrung und Kompetenz                                                                                                                                                                                                       | q | Ausgeglicheneres Bild                                                                                                                                                      | q    |
| 1474                       | Berufserfahrung und Soziale Skills sind besser                                                                                                                                                                                                  | q    | Abschluss, Berufserfahrung und Soziale Skills sind auf jeden Fall besser                                                                                                                                                           | q | Soziale Skills sind sehr wichtig, daher die Person                                                                                                                         | q    |
| 1483                       | Soziale Skills, berufserfahrung                                                                                                                                                                                                                 | q    | Bessere Werte                                                                                                                                                                                                                      | o | ausgeglichenerere Werte                                                                                                                                                    | o    |
| 1508                       | Methodenkompetenz, jünger                                                                                                                                                                                                                       | q, a | Methodenk.                                                                                                                                                                                                                         | q | Methodenkom.                                                                                                                                                               | q    |
| 1518                       | Kandidat 2 besitzt ein kompletteres Profil                                                                                                                                                                                                      | o    | Kandidatin 2 besitzt ein kompletteres Skillsset.                                                                                                                                                                                   | q | Kandidat 1 besitzt keine Methodenkompetenz, weshalb er für den Job nicht geeignet ist.                                                                                     | q    |
| 1522                       | KI Empfehlung                                                                                                                                                                                                                                   | k    | Subjektiv besser                                                                                                                                                                                                                   | o | Sieht geeigneter aus als der andere                                                                                                                                        | o    |
| 1529                       | sind sehr ähnlich, ich vertraue auf KI                                                                                                                                                                                                          | k    | Sehr ähnlich wieder, vertraue auf KI                                                                                                                                                                                               | k | weniger starke schwächen                                                                                                                                                   | o    |
| 1533                       | Sieht insgesamt sehr gut aus.                                                                                                                                                                                                                   | o    | Mehr Berufserfahrung, mehr Methodenkompetenz.                                                                                                                                                                                      | q | Mehr Berufserfahrung, mehr Methodenkompetenz.                                                                                                                              | q    |

|      |                                                                                                                                                                                   |      |                                                                                                                                                                                                                                                                                                        |   |                                                                                                                                                                                                                                                                                                |         |
|------|-----------------------------------------------------------------------------------------------------------------------------------------------------------------------------------|------|--------------------------------------------------------------------------------------------------------------------------------------------------------------------------------------------------------------------------------------------------------------------------------------------------------|---|------------------------------------------------------------------------------------------------------------------------------------------------------------------------------------------------------------------------------------------------------------------------------------------------|---------|
| 1549 | soz skills besser                                                                                                                                                                 | q    | soz skills besser                                                                                                                                                                                                                                                                                      | q | soz skills besser                                                                                                                                                                                                                                                                              | q       |
| 1552 | Knappe Entscheidung durch Berufserfahrung.                                                                                                                                        | q    | Wieder Knappe Entscheidung, soziale Kompetenz und Abschluss ausschlaggebend.                                                                                                                                                                                                                           | q | Entscheidend war hier die Methodenkompetenz.                                                                                                                                                                                                                                                   | q       |
| 1554 | Ist zwar älter aber hat gute soziale Skills und Berufserfahrung                                                                                                                   | q, a | Insgesamt besser aufgestellt, leider nicht so gute Soziale Skills aber würd ich gerne kennenlernen                                                                                                                                                                                                     | q | Sprachen und Soziale Skills, kann gut für Auslandsgespräche/Planungen eingesetzt werden, Methoden müssten gestärkt werden                                                                                                                                                                      | q       |
| 1571 | Berufserfahrung und Methodenkompetenz                                                                                                                                             | q    | Soziale Skills                                                                                                                                                                                                                                                                                         | q | Soziale Skills                                                                                                                                                                                                                                                                                 | q       |
| 1572 | Mehr Soziale Skills und Berufserfahrung                                                                                                                                           | q    | höhere Soziale Skills, ausgewogeneres Bild                                                                                                                                                                                                                                                             | q | bessere Methodenkompetenz, mehr Erfahrung                                                                                                                                                                                                                                                      | q       |
| 1602 | Erfahrung gleicht schlechteren Abschluss aus bzw. lässt diese Person attraktiver wirken                                                                                           | q    | Fähigkeiten ausgewogener verteilt, könnte hier von Vorteil sein                                                                                                                                                                                                                                        | q | überzeugt durch Methodenkompetenz und Berufserfahrung                                                                                                                                                                                                                                          | q       |
| 1621 | besserer Abschluss und skills                                                                                                                                                     | q    | nur einmal zwei sterne                                                                                                                                                                                                                                                                                 | q | nirgendwo einen stern                                                                                                                                                                                                                                                                          | q       |
| 1631 | Bewerber überzeugt durch bessere Social Skills und mehr Berufserfahrung, zudem KI-Empfehlung                                                                                      | q    | Entscheidung letztlich aufgrund der Methodenkompetenz und der Empfehlung der KI getroffen                                                                                                                                                                                                              | k | Gute Methodenkompetenz und Berufserfahrung, zudem KI-Empfehlung                                                                                                                                                                                                                                | q, k    |
| 1640 | Abschluss zweitrangig                                                                                                                                                             | q    | soziale skills                                                                                                                                                                                                                                                                                         | q | 1 Stern bei Methodenkompetenz ist zu wenig                                                                                                                                                                                                                                                     | q       |
| 1646 | Erfahrung und soziale Skills schlagen hier Methodenkompetenz                                                                                                                      | q    | Berufserfahrung, Methodenkompetenz und Abschluss wiegen schwächen in sozialen Skills auf                                                                                                                                                                                                               | q | Methodenkompetenz von 1em Stern bei anderem Kandidaten inakzeptabel                                                                                                                                                                                                                            | q       |
| 1657 | Summe aus Sozialen skills und Methodenkompetenz hier größer - Minimum aus Sozialen skills und Methodenkompetenz hier größer                                                       | q    | bessere Methodenkompetenz, Sprache und Berufserfahrung gleichen die schlechteren Sozialen Skills aus. Schlechterer Abschluss in Anbetracht der Berufserfahrung irrelevant (Abschluss ist mit 4/5 nach wie vor ausreichend!!!)                                                                          | q | - Kontrahent mit 1/5 bei Methodenkompetenz ungeeignet, auch bessere Soziale Skills des Kontrahenten gleichen das nicht aus                                                                                                                                                                     | q       |
| 1661 | KI Empfehlung                                                                                                                                                                     | k    | Sehe hier das größere Potenzial                                                                                                                                                                                                                                                                        | o | KI Empfehlung                                                                                                                                                                                                                                                                                  | k       |
| 1662 | Berufserfahrung, Methodenkomp. und KI                                                                                                                                             | q, k | Soziale Skills                                                                                                                                                                                                                                                                                         | q | KI und Sprachen hier nicht so wichtig                                                                                                                                                                                                                                                          | q, k    |
| 1678 | Bessere soziale Skills.                                                                                                                                                           | q    | Mehr Berufserfahrung.                                                                                                                                                                                                                                                                                  | q | Bessere Methodenkompetenz.                                                                                                                                                                                                                                                                     | q       |
| 1682 | Sehr gute Soziale Skills und viel Berufserfahrung.                                                                                                                                | q    | Solidere qen.                                                                                                                                                                                                                                                                                          | o | Bessere Medienkompetenz, nur eine q unter drei Sternen                                                                                                                                                                                                                                         | q       |
| 1687 | Entscheidend hier die Kombination aus Sozialen Skills und Berufserfahrung. Methodenkompetenz ist leicht schlechter, kann aber vermutlich noch durch Schulungen verbessert werden. | q    | Auch hier ist die soziale Kompetenz entscheidend. Da die Bewerberin jünger ist, kann folglich weniger Berufserfahrung aufgezeigt werden. Die ebenfalls geringere Methodenkompetenz kann vermutlich schnell verbessert werden, da der ausgezeichnete Abschluss aufzeigt, dass die Person ehrgeizig ist. | q | Entscheidend hier ist die sehr gute soziale Kompetenz. Fehlende Berufserfahrung und geringe Methodenkompetenz könnte darauf zurück zuschließen sein, dass die Frau einige Jahre aufgrund von Schwangerschaften nicht gearbeitet hat. Dadurch sollte die Kandidatin nicht benachteiligt werden. | q, g, e |
| 1696 | Vertrauen in die KI-Empfehlung, da Entscheidung ansonsten schwierig, da beide Bewerber dieselbe Anzahl an Sternen haben                                                           | k    | KI-Empfehlung                                                                                                                                                                                                                                                                                          | k | Vertrauen in die KI                                                                                                                                                                                                                                                                            | k       |
| 1710 | soziale skills und erfahrung                                                                                                                                                      | q    | soziale skills und alter                                                                                                                                                                                                                                                                               | q | methodenkompetenz bei konkurenz zu schwach                                                                                                                                                                                                                                                     | q       |
| 1720 | Jünger und besser ausgebildet                                                                                                                                                     | q, a | Methodik - Berufserfahrung                                                                                                                                                                                                                                                                             | q | Ausgeglichener                                                                                                                                                                                                                                                                                 | o       |
| 1729 | Empfehlung                                                                                                                                                                        | k    | Ist besser                                                                                                                                                                                                                                                                                             | o | ist besser                                                                                                                                                                                                                                                                                     | o       |

|                            |                                                                                                                                                                                                                                                                                                         |      |                                                                                                                                                                                                                                                        |      |                                                                                                                                                                           |   |
|----------------------------|---------------------------------------------------------------------------------------------------------------------------------------------------------------------------------------------------------------------------------------------------------------------------------------------------------|------|--------------------------------------------------------------------------------------------------------------------------------------------------------------------------------------------------------------------------------------------------------|------|---------------------------------------------------------------------------------------------------------------------------------------------------------------------------|---|
| 1749                       | Mehr Berufserfahrung und soziale Skills                                                                                                                                                                                                                                                                 | q    | KI-Empfehlung                                                                                                                                                                                                                                          | k    | Bessere soziale Skills                                                                                                                                                    | q |
| 1750                       | Viel Berufserfahrung und soziale Skills                                                                                                                                                                                                                                                                 | q    | Sprachlich besser + Medienkompetenz                                                                                                                                                                                                                    | q    | mehr Berufserfahrung und bessere Medienkompetenz                                                                                                                          | q |
| 1759                       | Kombination aus Berufserfahrung und Soziale Skills                                                                                                                                                                                                                                                      | q    | ggf. noch lernfähiger bzgl. Methodenkompetenz aufgrund Alter                                                                                                                                                                                           | q, a | Methodenkompetenz beim Vergleichsbewerber zu gering                                                                                                                       | q |
| 1771                       | Jung                                                                                                                                                                                                                                                                                                    | a    | Jungen Menschen eine Chance geben,                                                                                                                                                                                                                     | e, a | Bessere Bewertungen                                                                                                                                                       | q |
| 1787                       | Mehr soziale Skills und Berufserfahrung                                                                                                                                                                                                                                                                 | q    | deutlich jünger und nur etwas weniger Berufserfahrung und Medienkompetenz                                                                                                                                                                              | q, a | Mehr soziale Skills und gut in Sprachen                                                                                                                                   | q |
| 1795                       | In Gedanken an vorherige eingeladene Bewerber*innen, passt Sven aufgrund seines jungen Alters vermutlich besser ins Team, was die niedrige Bewertung der sozialen Skills ausgleichen könnte. Ausschlaggebend für mich ist letzten Endes aber der höhere Abschluss und die besseren Methodenkompetenzen! | q, a | Hier würde ich mich auf die KI-Empfehlung berufen. Entsprechend der Bewertung sehe ich in Monika einen Allrounder, der den Job trotz geringerer sozialer Skills gut ausüben kann, sodass man über die ein oder andere Schwäche auch hinweg sehen kann. | q, k | Die Methodenkompetenz überzeugt mich hier.                                                                                                                                | q |
| 1801                       | Bessere Mischung als anderer Kandidat                                                                                                                                                                                                                                                                   | o    | Bessere Skillmischung                                                                                                                                                                                                                                  | q    | Methodenkompetenz                                                                                                                                                         | q |
| 1810                       | höhere soziale Skills = wichtig für PRM bei Abstimmung                                                                                                                                                                                                                                                  | q    | besseres Gesamtpaket dank medienkompetenz + berufserfahrung                                                                                                                                                                                            | q    | IT Job benötigt Mindestmaß an Medienkompetenz                                                                                                                             | q |
| 1811                       | mehr Berufserfahrung                                                                                                                                                                                                                                                                                    | q    | viel jünger                                                                                                                                                                                                                                            | a    | Methodenkompetenz und Berufserfahrung mehr                                                                                                                                | q |
| 1824                       | ausgeglicheneres Profil                                                                                                                                                                                                                                                                                 | q    | höhere methodenkompetenzen                                                                                                                                                                                                                             | q    | höhere methodnekompetenzen                                                                                                                                                | q |
| 1832                       | In den wichtigen Kategorien überlegen, Kandidat 2 stolpert über die mangelnde Soziale Kompetenz.                                                                                                                                                                                                        | q    | 19 Jahre Jünger, deutlich überlegen im sozialen Bereich + sehr hoher Abschluss, der nahelegt, dass sowohl Berufserfahrung als auch Methodenkompetenz schnell ausgeglichen werden können.                                                               | q, a | Beide keine gute Wahl, da eklatante Schwächen in wichtigen Bereichen (Kandidat 1 Sozial, Kandidat 2 Kompetenz). Kandidat 1 bietet das insgesamt ausgeglichene Gesamtpaket | q |
| 1834                       | Berufserfahrungm Soz. Skills & Methoden                                                                                                                                                                                                                                                                 | q    | Soz. Skills                                                                                                                                                                                                                                            | q    | Berufserfahrung, Methoden                                                                                                                                                 | q |
| 1836                       | Soziale Skills sind wichtiger als Abschluss                                                                                                                                                                                                                                                             | q    | ausgeglichene Skills                                                                                                                                                                                                                                   | q    | ausgeglichene Skills                                                                                                                                                      | q |
| 1857                       | vergleichbar, aber Berufserfahrung und Sozial skills besser                                                                                                                                                                                                                                             | q    | vergleichbar, soziale skills höher (Verantwortung)                                                                                                                                                                                                     | q    | etwas mehr Erfahrung                                                                                                                                                      | q |
| <b>Condition 3 – Job 3</b> |                                                                                                                                                                                                                                                                                                         |      |                                                                                                                                                                                                                                                        |      |                                                                                                                                                                           |   |
| 1341                       | mehr Softwareerfahrung                                                                                                                                                                                                                                                                                  | q    | mehr Softwareerfahrung                                                                                                                                                                                                                                 | q    | mehr Softwareerfahrung                                                                                                                                                    | q |
| 1342                       | Abschluss und Sprache für qualitativ und sprachlich gute Abschlüsse                                                                                                                                                                                                                                     | q    | Ausgewogenere Fähigkeiten                                                                                                                                                                                                                              | q    | Schwere Entscheidung, folge KI                                                                                                                                            | k |
| 1362                       | Die Bewerberin hat bereits einiges an Softwareerfahrung und einen sehr guten Abschluss. Sie konnte ein bisschen Berufserfahrung sammeln und hat zusätzliche gute soziale Skills.                                                                                                                        | q    | Die Bewerberin hat sowohl Softwareerfahrung als auch viel Berufserfahrung. Zusätzlich hat sie einen sehr guten Abschluss.                                                                                                                              | q    | Der Bewerber konnte noch keine Berufserfahrung sammeln, aber er hat einiges an Softwareerfahrung und einen sehr guten Abschluss.                                          | q |
| 1383                       | mehr Berufserfahrung höhere soziale Skills                                                                                                                                                                                                                                                              | q    | höhere soziale Skills, stelle ich mir angenehmer im Team vor                                                                                                                                                                                           | q    | mehr Berufserfahrung und höhere soziale Skills                                                                                                                            | q |
| 1385                       | weiblich                                                                                                                                                                                                                                                                                                | g    | sprachen                                                                                                                                                                                                                                               | q    | berufserfahrung                                                                                                                                                           | q |

|      |                                                                                                                                                 |      |                                                                                                                                                                                                        |      |                                                                                                                                   |      |
|------|-------------------------------------------------------------------------------------------------------------------------------------------------|------|--------------------------------------------------------------------------------------------------------------------------------------------------------------------------------------------------------|------|-----------------------------------------------------------------------------------------------------------------------------------|------|
| 1405 | Mädel sind gute Buchhalterinnen                                                                                                                 | o    | mehr Softwarskills                                                                                                                                                                                     | q    | die Frau ist arbeitsaffiner                                                                                                       | o    |
| 1416 | Mehr Berufserfahrung                                                                                                                            | q    | Mehr Berufserfahrung und Softwareerfahrung                                                                                                                                                             | q    | Mehr Berufserfahrung                                                                                                              | q    |
| 1423 | Knappe Entscheidung, hier würde ich auch beide einladen und dann entscheiden. Aber gehe mit der Entscheidung der KI                             | k    | Mehr Softwareerfahrung, sonst sehr ähnlich                                                                                                                                                             | q    | Bessere soziale Skills, nur geriner Unterschied bei Softwareerfahrung                                                             | q    |
| 1445 | Berufserfahrung                                                                                                                                 | q    | Abschluss, Berufserfahrung, Soziale Skills                                                                                                                                                             | q    | Berufserfahrung                                                                                                                   | q    |
| 1457 | Mehr Erfahrung, höherer Abschluss                                                                                                               | q    | Mehr Erfahrung                                                                                                                                                                                         | q    | ausgeglichene Verteilung                                                                                                          | o    |
| 1474 | Mehr Sterne bei Soft-Skills, Berufserfahrung . Sprachkenntnisse sind bei der Aufgabe nicht so wichtig                                           | q    | Softwareerfahrung, Abschluss ist besser                                                                                                                                                                | q    | Berufserfahrung und Soft-Skills sind auf jeden Fall besser                                                                        | q    |
| 1483 | Unsicher, KI Empfehlung genommen                                                                                                                | k    | Ausgeglichene Werte                                                                                                                                                                                    | o    | Soziale Skills, Berufserfahrung                                                                                                   | q    |
| 1508 | weiblich, jünger                                                                                                                                | g, a | weiblich                                                                                                                                                                                               | g    | berufserf.                                                                                                                        | q    |
| 1518 | Kandidatin 2 hat für den Beruf bessere Fähigkeiten. Kandidat Nummer 1 hat zwar herausragende Soziale Skills, diese werden aber nicht gebraucht. | q    | Kandidat 2 kann eher mit einer benötigten Software umgehen, während die Sozialen Skills bei dem gefragten Job nicht so wichtig sind. Der Abschluss bei dem Alter der Kandidaten nicht mehr so wichtig. | q    | Kandidatin 2 weist mehr Berufserfahrung auf und ist Dank ihrer sozialen Skills besser in der Lage mit anderen Leuten zu arbeiten. | q    |
| 1522 | Sieht subjektiv besser aus                                                                                                                      | o    | wirkt besser                                                                                                                                                                                           | o    | Gesamtpaket passt besser                                                                                                          | o    |
| 1529 | Hat zwar nicht so viel Erfahrung, hat aber ansonsten ein gut abgerundetes Profil                                                                | q    | Sind ähnlich qualifiziert, in dem Fall würde ich eine Frau bevorzugen                                                                                                                                  | q, g | Auch hier ähnlich, weiblich bevorzugt                                                                                             | q, g |
| 1533 | Besserer Abschluss, bessere Softwareerfahrung.                                                                                                  | q    | Guter Abschluss, viel Berufserfahrung.                                                                                                                                                                 | q    | Besserer Abschluss, mehr Softwareerfahrung.                                                                                       | q    |
| 1549 | Bessere soziale Skills                                                                                                                          | q    | Ausgewogeneres Profil                                                                                                                                                                                  | o    | Soz Skills                                                                                                                        | q    |
| 1552 | Enge Auswahl, der KI Empfehlung gefolgt, Anderer Bewerber eventuell auf Nachrücker setzen.                                                      | k    | Knappes Rennen, Frau Richter konnte überzeugen.                                                                                                                                                        | o    | Der Abschluss hat die geringe Berufserfahrung ausgeglichen.                                                                       | q    |
| 1554 | soziale Skills sind ausgesprochen hoch, andere Werte auch in Ordnung                                                                            | q    | mehr Soziale Kompetenz und ansonsten auch etwas stärker                                                                                                                                                | q    | schwer Entscheidung, hab mich wegen der Sozialen Skills und des Geschlechts für diese Bewerberin entschieden                      | q, g |
| 1571 | soziale Skills und Berufserfahrung                                                                                                              | q    | Softwareerfahrung und Berufserfahrunf                                                                                                                                                                  | q    | soziale Skills                                                                                                                    | q    |
| 1572 | Mehr Softwareerfahrung und besserer Abschluss, Soziale Skills weniger wichtig, bessere Sprachkenntnisse sind nützlicher für Berichte schreiben  | q    | Mehr Softwareerfahrung, Sterneverteilung gibt für mich ein ähnliches Bild der Fähigkeiten, Soziale Skills weniger wichtig                                                                              | q    | Mehr Berufserfahrung, Abstände in anderen Kategorien nicht dramatisch                                                             | q    |
| 1602 | Gesamtpaket wirkt stimmiger - Erfahrungen können schnell gesammelt werden                                                                       | q    | überzeugt durch besseren Abschluss - Ansonsten gleichwertig empfunden                                                                                                                                  | q    | besserer Abschluss - Berufserfahrung kann schnell gesammelt werden                                                                | q    |
| 1621 | bessere sprachkenntnisse und softwareerfahrung                                                                                                  | q    | mehr sterne                                                                                                                                                                                            | q    | zwar wenig berufserfarunge, aber bessere softwareerfahrung                                                                        | q    |
| 1631 | Aufgrund der KI Empfehlung und da Sprache, Abschluss und Softwareerfahrung höher waren                                                          | q, k | Berufserfahrung, Sprachkenntnisse und Softwareerfahrung höher                                                                                                                                          | q    | Bewerber in allen Punkten, außer der Berufserfahrung und den Social Skills besser                                                 | q    |
| 1640 | Berufserfahrung und soziale skills wichtiger als Abschluss                                                                                      | q    | ähnlich qualifiziert, aber diversity                                                                                                                                                                   | q, e | Berufserfahrung und soziale skills wichtiger als Abschluss                                                                        | q    |

|      |                                                                                                                                       |         |                                                                                                                                                                                                    |      |                                                                                                                                                                            |      |
|------|---------------------------------------------------------------------------------------------------------------------------------------|---------|----------------------------------------------------------------------------------------------------------------------------------------------------------------------------------------------------|------|----------------------------------------------------------------------------------------------------------------------------------------------------------------------------|------|
| 1646 | Ausgewogener Abschluss + Berufserfahrung Software meist leicht erlernbar                                                              | q       | Ausgeglichener in relevanten Gebieten (Bildung, Erfahrung, Software                                                                                                                                | q    | Ausgeglichener in relevanten Kategorien                                                                                                                                    | o    |
| 1657 | besserer Abschluss gleicht schlechtere Berufserfahrung aus - Softwareerfahrung etwas besser                                           | q       | - schlechtere Soziale Skills irrelevant (2/5 reicht für Buchhaltung aus) - bessere Softwareerfahrung mit Blick auf Zukunft relevanter als schlechterer Abschluss                                   | q    | nur 1/5 Berufserfahrung beim Kontrahent ist zu wenig                                                                                                                       | q    |
| 1661 | Die Auswahl ist mir schwer gefallen, ich habe mich auf die Empfehlung verlassen                                                       | q       | Die einzelnen Kriterien sind ausgewogener erfüllt                                                                                                                                                  | q    | Die Auswahl ist mir schwer gefallen, ich habe mich auf die Empfehlung verlassen                                                                                            | k    |
| 1662 | KI und Abschluß                                                                                                                       | q, k    | KI Abschluß und Berufserfahrung                                                                                                                                                                    | q, k | Abschluss                                                                                                                                                                  | q    |
| 1678 | Mehr Berufserfahrung und soziale Skills.                                                                                              | q       | Besserer Abschluss und Berufserfahrung.                                                                                                                                                            | q    | Bessere soziale Skills.                                                                                                                                                    | q    |
| 1682 | Weiblich, jünger, nur eine q unter drei Sterne.                                                                                       | q, g, a | Dreimal vier Sterne. Social Skills nicht ganz so wichtig in Buchhaltung                                                                                                                            | q    | Berufseinsteiger mit sehr guten Abschluss                                                                                                                                  | q    |
| 1687 | Softwareerfahrung entscheidend.                                                                                                       | q       | In 3 von 5 Punkten besser. Soziale Kompetenz ist in der Buchhaltung zweitrangig. Der Abschluss ist mit weniger Sternen bewertet, ist nach jahrelanger Berufserfahrung jedoch nicht stark relevant. | q    | Softwareerfahrung entscheidend. Berufserfahrung ist gering weniger als bei der anderen Kandidatin, soziale Kompetenz ist in der Buchhaltung zweitrangig.                   | q    |
| 1696 | Vertrauen in die KI                                                                                                                   | k       | beide Bewerber gleiche Sternanzahl, daher Vertrauen in KI                                                                                                                                          | k    | Vertrauen in die KI                                                                                                                                                        | k    |
| 1710 | erfahrung                                                                                                                             | q       | softwareerfahrung                                                                                                                                                                                  | q    | kompetenz und abschluss                                                                                                                                                    | q    |
| 1720 | Solideres GESamtprofil                                                                                                                | q       | Mehr Erfahrung und besser social skills                                                                                                                                                            | q    | Mehr Erfahrung und bessere Soccial Skills                                                                                                                                  | q    |
| 1729 | Empfehlung                                                                                                                            | q       | empfehung                                                                                                                                                                                          | k    | Empfehlung, Kandidaten sind sich ähnlich                                                                                                                                   | k    |
| 1749 | Besseren Abschluss und mehr Softwareerfahrung                                                                                         | q       | Wirkt insgesamt kompetenter                                                                                                                                                                        | q    | KI-Empfehlung                                                                                                                                                              | k    |
| 1750 | Besserer Abschluss und mehr Softwareerfahrung                                                                                         | q       | bessere Softwareerfahrung                                                                                                                                                                          | q    | Besserer Abschluss und mehr Softwareerfahrung                                                                                                                              | q    |
| 1759 | Höhere Berufserfahrung                                                                                                                | q       | KI-Empfehlung; Andere Eigenschaften fast gleichwertig                                                                                                                                              | k    | KI-Empfehlung, da Bewertungen fast gleichwertig                                                                                                                            | k    |
| 1771 | Frauenquote, bessere Beurteilungen                                                                                                    | q, e, g | Softwareerfahrung, bessere Beurteilungen                                                                                                                                                           | q    | Frauenquote,                                                                                                                                                               | e, g |
| 1787 | höherer Abschluss, mehr Softwareerfahrung                                                                                             | q       | Sprachen nicht so wichtig, Abschluss besser                                                                                                                                                        | q    | Besserer Abschluss und mehr Softwareerfahrung                                                                                                                              | q    |
| 1795 | hier vertraue ich der KI-Empfehlung!                                                                                                  | k       | Geringerer Abschluss und hohe Software-Erfahrung!                                                                                                                                                  | q    | Entspricht dem Anforderungsprofil besser als Dominik.                                                                                                                      | q    |
| 1801 | soz Skills                                                                                                                            | q       | Bessere Kombo                                                                                                                                                                                      | o    | soz Skills und Berufserfahrung                                                                                                                                             | q    |
| 1810 | Soziale Skills unwichtig für den Job                                                                                                  | q       | verklückt                                                                                                                                                                                          | x    | besserer abschluss + softwareerfahrung                                                                                                                                     | q    |
| 1811 | da soziale skills nicht so entscheidend                                                                                               | q       | mehr Softwarerfahrung                                                                                                                                                                              | q    | mehr Softwareer.+Berufserfahrung                                                                                                                                           | q    |
| 1824 | ausgeglicheneres Profil                                                                                                               | o       | ausgeglicheneres Profil                                                                                                                                                                            | o    | ausgeglicheneres Profil                                                                                                                                                    | o    |
| 1832 | Größter Vorteil von Kandidat 1 war in den weniger wichtigen Sozialen Skills, dafür Kandidatin 2 bei Abschluss und Sprachen überlegen. | q       | Abschluss wichtiger als Sprachen, Soziale Skills unwichtiger als Berufserfahrung. Harte Ent-                                                                                                       | q, a | Im Vergleich zu anderen Kandidaten würde ich keinen von beiden einladen. Da beide chancenlos sind, habe ich keine große Energie investiert und bin dem Rat der KI gefolgt. | k    |

|      |                                                                                           |   |                                                                                                            |   |                                                               |   |
|------|-------------------------------------------------------------------------------------------|---|------------------------------------------------------------------------------------------------------------|---|---------------------------------------------------------------|---|
|      | Berufs- und Software-Erfahrung heben sich gegenseitig auf, daher Wahl von Kandidatin zwei |   | scheidung, aber Kandidat 2 ist zwei Jahre jünger und kann in dieser Zeit ggf die Berufserfahrung aufholen. |   |                                                               |   |
| 1834 | Mehr Berufserfahrung                                                                      | q | Mehr Softwareerfahrung                                                                                     | q | Berufserfahrung                                               | q |
| 1836 | mehr Berufserfahrung und soziale Skills                                                   | q | softwareerfahrung ist wichtiger                                                                            | q | mehr Berufserfahrung                                          | q |
| 1857 | verantwortungsvoller Job, höhere Sozialkompetenz und Berufserfahrung                      | q | vergleichbare Profile, höhere Soziale skills                                                               | q | vergleichbar, mehr soziale Skills, etwas mehr Berufserfahrung | q |

**Table C4** Candidate Selection Reasons of Participants in Condition 4

| ID                         | Reason 1                                                                                                     | C    | Reason 2                                                                                                                                                                     | C    | Reason 3                                                                                                                                            | C |
|----------------------------|--------------------------------------------------------------------------------------------------------------|------|------------------------------------------------------------------------------------------------------------------------------------------------------------------------------|------|-----------------------------------------------------------------------------------------------------------------------------------------------------|---|
| <b>Condition 4 – Job 1</b> |                                                                                                              |      |                                                                                                                                                                              |      |                                                                                                                                                     |   |
| 1336                       | Berufserfahrung und Programmiererfahrung im IT Bereich wichtig                                               | q    | Fast gleichwertig, aber soziale Skills bei gleichwertiger Erfahrungsstufe höher                                                                                              | q    | Programmiererfahrung                                                                                                                                | q |
| 1368                       | programmierung                                                                                               | q    | programmierung, sprachen                                                                                                                                                     | q    | insgesamt besser                                                                                                                                    | o |
| 1372                       | Merh Programmiererfahrung und mehr Berufserfahrung und gute soziale Skills plus Abschluss                    | q    | Mehr an Berufserfahrung wiegt die Programmiererfahrung auf, soziale Skills sehr viel besser                                                                                  | q    | Finde Berufserfahrung wichtiger als ein Stern mehr bei Programmiererfahrung. Soziale Skills bei beiden gleich.                                      | q |
| 1395                       | Berufserfahrung, Programmieren                                                                               | q    | Programmieren                                                                                                                                                                | q    | Programmieren                                                                                                                                       | q |
| 1396                       | Bessere Bewertungen in den relevanten Punkten                                                                | q    | Mehr Berufserfahrung und ausreichende Programmiererfahrung                                                                                                                   | q    | Mehr Programmiererfahrung                                                                                                                           | q |
| 1413                       | mehr Berufs- und Programmiererfahrung                                                                        | q    | besserer Abschluss und Programmiererfahrung, soziale Skills eher geringe Priorität                                                                                           | q    | besserer Abschluss und Programmiererfahrung                                                                                                         | q |
| 1420                       | Kandidat ist besser                                                                                          | o    | KI Empfehlung                                                                                                                                                                | k    | Kandidatin scheint besser zu sein                                                                                                                   | o |
| 1440                       | Empfehlung der KI, mehr Erfahrung                                                                            | q, k | KI-Empfehlung. zwar weniger Berufserfahrung aber deutlich mehr Programmiererfahrung                                                                                          | q, k | KI-Empfehlung, mehr Sterne                                                                                                                          | k |
| 1459                       | Erfahrung als Admin wichtiger                                                                                | q    | Allgemeines                                                                                                                                                                  | o    | Erfahrungswerte balancierter                                                                                                                        | o |
| 1475                       | Programmiererfahrung                                                                                         | q    | Soziale Skills                                                                                                                                                               | q    | Sprachen                                                                                                                                            | q |
| 1502                       | mehr Berufs- und Programmiererfahrung                                                                        | q    | Besserer Abschluss, mehr Programmiererfahrung                                                                                                                                | q    | Besserer Abschluss, mehr Programmiererfahrung, gute soziale Skills                                                                                  | q |
| 1504                       | Mehr Erfahrung                                                                                               | q    | Höhere soziale Skills                                                                                                                                                        | q    | Bessere Sprachkenntnis                                                                                                                              | q |
| 1512                       | Hat mehr Berufserfahrung und Programmiererfahrung Gleiche Social Skills                                      | q    | Schwierige Entscheidung, habe mich der Empfehlung der KI angeschlossen                                                                                                       | k    | KI Empfehlung                                                                                                                                       | k |
| 1523                       | bessere Programmiererfahrung                                                                                 | q    | bessere Soziale skills                                                                                                                                                       | q    | Sprach-fähigkeiten besser, soziale Skills gut-sehr gut                                                                                              | q |
| 1531                       | mehr Berufs- und Programmiererfahrung                                                                        | q    | Berufserfahrung und Social Skills                                                                                                                                            | q    | Programmiererfahrung                                                                                                                                | q |
| 1538                       | Höhere Berufs- und Programmiererfahrung, Sprache eher weniger wichtig, da Kommunikation nur zweitrangig ist. | q    | Besserer Abschluss und mehr Programmiererfahrung. Berufserfahrung gering, kann aber angelernt werden. Social skills bei dieser Stelle weniger wichtig und daher ausreichend. | q    | Höhere Programmiererfahrung und besserer Abschluss. Insgesamt nur ein kleiner Vorsprung zu Mitbewerberin. Sprache als eher wenig wichtig angesehen. | q |

|      |                                                                                                                                                     |   |                                                                                                                                                              |      |                                                                                                                       |      |
|------|-----------------------------------------------------------------------------------------------------------------------------------------------------|---|--------------------------------------------------------------------------------------------------------------------------------------------------------------|------|-----------------------------------------------------------------------------------------------------------------------|------|
| 1542 | für IT-JOb sind Erfahrung, Programmier-Skills wichtiger als Sprache (eh meist auf englisch) und abschluss                                           | q | für IT-JOb wieder programmiererfahrung sehr wichtig plus alle kategorien bis auf berufserfahrung besser als bei anderen bewerberin                           | q    | (abschluss), programmiererfahrung besser, wenn auch berufserfahrung geringer                                          | q    |
| 1558 | genug Programmier-/Berufserfahrung                                                                                                                  | q | bessere soziale Skills (hier wichtig, weil Unterstützung Belegschaft), Programmiererfahrung ähnlich                                                          | q    | wichtige Skills erfüllt                                                                                               | o    |
| 1565 | Berufserfahrung                                                                                                                                     | q | Frauenquote erhöhen                                                                                                                                          | e, g | Programmiererfahrung                                                                                                  | q    |
| 1570 | Empfehlung KI weil Rest etwa gleichwertig                                                                                                           | k | Empfehlung KI, Rest etwa gleich                                                                                                                              | q, k | Etwa gleich, deshalb Empfehlung KI                                                                                    | q, k |
| 1581 | mehr Berufs- und Programmiererfahrung                                                                                                               | q | mehr Programmiererfahrung, besserer Abschluss                                                                                                                | q    | mehr Programmiererfahrung                                                                                             | q    |
| 1588 | Mehr Berufserfahrung und höhere Programmiererfahrung                                                                                                | q | weit höhere Soziale Skills                                                                                                                                   | q    | mehr Programmiererfahrung                                                                                             | q    |
| 1617 | berufs- und programmiererfahrung besser                                                                                                             | q | bessere soziale skills                                                                                                                                       | q    | programmiererfahrung und abschluss besser                                                                             | q    |
| 1619 | mehr Berufserfahrung - mehr Programmiererfahrung                                                                                                    | q | mehr Sprachen - höherer Abschluss - mehr Programmiererfahrungen - KI-Empfehlung                                                                              | q, k | mehr Sprachen - mehr Berufserfahrung - mehr soziale skills                                                            | q    |
| 1627 | Erfahrung in jeglicher Hinsicht ist key                                                                                                             | o | Knapp besser wegen Abschluss                                                                                                                                 | q    | Besserer Abschluss                                                                                                    | q    |
| 1641 | Berufserfahrung, programmiererfahrung                                                                                                               | q | auf den meisten Kriterien besser                                                                                                                             | q    | abschluss, programmieren                                                                                              | q    |
| 1642 | mehr Programmiererfahrung                                                                                                                           | q | ausgeprägtere Programmierkenntnisse                                                                                                                          | q    | mehr Programmierkenntnisse                                                                                            | q    |
| 1652 | Hat mehr Arbeitserfahrung und Programmiererfahrung, wobei der andere Teilnehmer nur einen besseren Abschluss hat und leicht besser mit Sprachen ist | q | Bessere Attribute                                                                                                                                            | o    | Prima attribute, viel programmiererfahrung und soziale skills, wird auch von der KI empfohlen                         | q, k |
| 1663 | mehr berufserfahrung und soziale Fähigkeiten                                                                                                        | q | mehr berufs- und programmiererfahrung + KI empfehlung                                                                                                        | q, k | KI empfehlung+ mehr Programmiererfahrung und besserer Abschluss                                                       | q, k |
| 1681 | Die Programmierfähigkeit und die Berufserfahrung sind höher                                                                                         | q | Die Berufserfahrung ist höher, außerdem sind die sozialen Fähigkeiten besser ausgeprägt                                                                      | q    | Die Programmiererfahrung ist noch besser                                                                              | q    |
| 1684 | mehr Berufs- & Programmiererfahrung                                                                                                                 | q | soziale Skills und Berufserfahrung höher                                                                                                                     | q    | Programmiererfahrung m.E. relevanter als Berufserfahrung; aber tendenziell beide einladen                             | q    |
| 1690 | Kompetenter                                                                                                                                         | o | Jünger, bei ungefähr gleicher Kompetenz                                                                                                                      | q, a | Kompetenter trotz geringerer Berufserfahrung                                                                          | q    |
| 1694 | Programmierung                                                                                                                                      | q | Programmiererfahrung -Sprachen                                                                                                                               | q    | bessere Programmiererfahrung                                                                                          | q    |
| 1711 | Programmierfähigkeit und Berufserfahrung entscheidend                                                                                               | q | Abschluss und Kompetenz entscheidend in IT                                                                                                                   | q    | besser als Mitbewerber                                                                                                | o    |
| 1717 | mehr erfahrungen                                                                                                                                    | q | mehr berufserfahrung, bessere soziale skills für fragen der belegschaft                                                                                      | q    | bessere bewertung                                                                                                     | o    |
| 1726 | Programmierung                                                                                                                                      | q | Programmierung                                                                                                                                               | q    | Programmierung                                                                                                        | q    |
| 1748 | Berufserfahrung                                                                                                                                     | q | Programmiererfahrung                                                                                                                                         | q    | Programmiererfahrung                                                                                                  | q    |
| 1755 | Bewerber hat mehr Berufs- und Programmiererfahrung                                                                                                  | q | Guter Abschluss und viel Programmiererfahrung macht die fehlende Berufserfahrung wett. Soziale Skills für IT-Administration in meinen Augen nicht so wichtig | q    | nur minimal nachteilig in Abschluss und Programmiererfahrung, dafür bessere Berufserfahrung und höhere Sprachkenntnis | q    |

|                            |                                                                                             |      |                                                                                                            |      |                                                                                                                                                |      |
|----------------------------|---------------------------------------------------------------------------------------------|------|------------------------------------------------------------------------------------------------------------|------|------------------------------------------------------------------------------------------------------------------------------------------------|------|
| 1769                       | mehr Erfahrung in Programmierung und Beruf - höhere Relevanz als Noten                      | q    | bessere soziale skills                                                                                     | q    | Besserer Abschluss in Kombination mit mehr Programmiererfahrung und gleichzeitig gute soz. Kompetenz                                           | q    |
| 1772                       | IT- Kenntnisse                                                                              | q    | IT- Kenntnisse                                                                                             | q    | IT- Kenntnisse                                                                                                                                 | q    |
| 1785                       | Gleich viele Sterne, ähnlich alt aber von Ki empfohlen                                      | q, k | Gleich viele Sterne und das Alter ist ähnlich, aber von Ki empfohlen                                       | q, k | Gleich viele Sterne wie die andere, wobei nur Schwächen in der Sprache, das für den Job jedoch nicht so wichtig ist. Auch von der KI empfohlen | q, k |
| 1794                       | Soziale Skills (Anwenderunterstützung) und Programmiererfahrung (Problemlösung) besser      | q    | Soziale Skills und mehr Berufserfahrung, Programmiererfahrung kann Herrn Sahin nicht retten                | q    | mehr Programmiererfahrung                                                                                                                      | q    |
| 1805                       | ist geeigneter für die Stelle                                                               | o    | ist besser                                                                                                 | o    | Empfehlung                                                                                                                                     | k    |
| 1821                       | KI                                                                                          | k    | sind ähnlich, daher KI Empfehlung                                                                          | k    | KI                                                                                                                                             | k    |
| 1822                       | KI                                                                                          | k    | KI                                                                                                         | k    | KI                                                                                                                                             | k    |
| 1837                       | Bessere Berufserfahrung und Programmiererfahrung                                            | q    | bessere soziale Skills                                                                                     | q    | bessere Programmiererfahrung, soziale Skills, Abschluss                                                                                        | q    |
| 1844                       | Mehr Programmiererfahrung                                                                   | q    | Mehr Programmiererfahrung                                                                                  | q    | Mehr Programmiererfahrungen                                                                                                                    | q    |
| 1852                       | etwas mehr Erfahrung, KI-Empfehlung                                                         | q, k | mehr Programmiererfahrung, KI-Empfehlung                                                                   | q, k | mehr Programmiererfahrung, KI-Empfehlung                                                                                                       | q, k |
| 1855                       | Programmiererfahrung und Berufserfahrung besser                                             | q    | Programmiererfahrung besser                                                                                | q    | Mehr Berufserfahrung                                                                                                                           | q    |
| <b>Condition 4 – Job 2</b> |                                                                                             |      |                                                                                                            |      |                                                                                                                                                |      |
| 1336                       | Berufserfahrung und Soziale Skills bei durchschnittlicher Methodenkompetenz + KI-Empfehlung | q, k | Berufserfahrung + Methodenkompetenz                                                                        | q    | KI-Empfehlung                                                                                                                                  | k    |
| 1368                       | berufserfahrung                                                                             | q    | berufserfahrung                                                                                            | q    | well rounded                                                                                                                                   | o    |
| 1372                       | Bessere Methodenkompetenz, und Jünger, soziale Skills bei dem Job nicht vorrangig           | q, a | Besseres Gesamtpaket, Methodenkompetenz und mehr Berufserfahrung. soz. Skills hier nicht ganz so relevant. | q    | Berufserfahrung und Methodenkompetenz hier besser, was für diesen Job relevant ist.                                                            | q    |
| 1395                       | Methoden, weniger kurz vor der Rente                                                        | q    | Methoden, Erfahrung,                                                                                       | q    | Erfahrung, Methoden                                                                                                                            | q    |
| 1396                       | Herr Ackermann ist zu alt                                                                   | a    | Ist deutlich jünger und besitzt eine identische Gesamtbewertung                                            | q, a | Mehr Methodenkompetenz                                                                                                                         | q    |
| 1413                       | mehr Berufserfahrung und soziale Skills                                                     | q    | besserer Abschluss und soziale Skills                                                                      | q    | insgesamt ausgewogenere Verteilung der Fähigkeiten, anderer Bewerber hat zu wenig insgesamt                                                    | q    |
| 1420                       | Kandidaten scheinen ähnlich zu sein, deshalb KI Empfehlung                                  | k    | Kandidatin wirkt besser                                                                                    | o    | Der andere Kandidat ist zu schlecht (1 Stern bei Methodenkompetenz ist zu wenig)                                                               | q    |
| 1440                       | KI-Empfehlung                                                                               | k    | KI-Empfehlung                                                                                              | k    | KI-Empfehlung                                                                                                                                  | k    |
| 1459                       | allg. besser                                                                                | o    | Ausgeglichener                                                                                             | q    | Methoden > Sprachen                                                                                                                            | q    |
| 1475                       | Berufserfahrung                                                                             | q    | Alter                                                                                                      | a    | Berufserfahrung & Methoden                                                                                                                     | q    |
| 1502                       | Er bringt mehr Erfahrung und soziale Skills mit.                                            | q    | Sie hat den besseren Abschluss, mehr soziale Skills und mehr Methodenkompetenz                             | q    | lieber weniger Sprachen und mehr Methodenkompetenz und Erfahrung.                                                                              | q    |
| 1504                       | Höhere soziale skills                                                                       | q    | höhere Methodenkompetenz und Erfahrung                                                                     | q    | Mehr Erfahrung                                                                                                                                 | q    |

|      |                                                                                                                 |      |                                                                                                                                |      |                                                                                                |      |
|------|-----------------------------------------------------------------------------------------------------------------|------|--------------------------------------------------------------------------------------------------------------------------------|------|------------------------------------------------------------------------------------------------|------|
| 1512 | KI Empfehlung                                                                                                   | k    | KI Empfehlung                                                                                                                  | k    | Überall eher gut                                                                               | q    |
| 1523 | bessere soziale Skills                                                                                          | q    | besseres Gesamtpaket                                                                                                           | o    | nur bessere Methodenkompetenz ansonsten durchschnitt                                           | q    |
| 1531 | Soziale Skills + Berufserfahrung                                                                                | q    | Methodenkompetenz + Berufserfahrung                                                                                            | q    | Methodenkompetenz                                                                              | q    |
| 1538 | Social skills und Berufserfahrung vielversprechend, Methodenkompetenz nur leicht geringer als beim Mitbewerber. | q    | Sehr knapper Vorsprung. Methodenkompetenz und Berufserfahrung überzeugen, geringere social skills allerdings nicht irrelevant. | q    | Methodenkompetenz kritisch für diese Stelle, daher schneller Ausschluss des anderen Bewerbers. | q    |
| 1542 | Medienkompetenz ist da                                                                                          | q    | jünger --> medienkompetenz kann hier noch besser aufgebaut werden als soziale skills beim gegenüber vermutlich                 | q, a | zu wenig medienkompetenz bei anderem bewerber                                                  | q    |
| 1558 | mehr Berufserfahrung, KI-Empfehlung                                                                             | q    | Methodenkompetenz, Berufserfahrung                                                                                             | q    | Viel bessere Methodenkompetenz (wichtig)                                                       | q    |
| 1565 | Berufserfahrung                                                                                                 | q    | Berufserfahrung                                                                                                                | q    | Sprachen                                                                                       | q    |
| 1570 | Relativ gleich, Empfehlung der KI gefolgt                                                                       | k    | Soziale Skills wichtiger als manch andere Dinge                                                                                | q    | Empfehlung der KI                                                                              | k    |
| 1581 | soz- skills und Berufserfahrung besser                                                                          | q    | soz. skills besser                                                                                                             | q    | Methodenkompetenz besser                                                                       | q    |
| 1588 | gute Methodenkompetenz und soziale Skills                                                                       | q    | Bessere Methodenkompetenz und mehr Berufserfahrung                                                                             | q    | sehr gute Methodenkompetenz                                                                    | q    |
| 1617 | berufserfahrung besser                                                                                          | q    | methodenkompetenz und berufserfahrung besser                                                                                   | q    | bessere Methodenkompetenz                                                                      | q    |
| 1619 | mehr Berufserfahrung - mehr soziale skills - nur geringfügig weniger Medienkompetenz                            | q    | mehr Sprachen - mehr Berufserfahrung - mehr Medienkompetenz                                                                    | q    | mehr Berufserfahrung - deutlich mehr Medienkompetenz                                           | q    |
| 1627 | Leute aus Tübingen sind super!                                                                                  | o    | Soziale Skills sind sehr wichtig                                                                                               | q    | Jünger                                                                                         | a    |
| 1641 | höhere soziale Skills, ansonsten sind die sich ziemlichähnlich                                                  | q    | soziale skills                                                                                                                 | q    | Methodenkompetenz lässt sich leichter verbessern als soziale Skills                            | q    |
| 1642 | hohe Methodenkompetenz, wie in Ausschreibung beschrieben                                                        | q    | hohe Methodenkompetenz, wie in Ausschreibung beschrieben                                                                       | q    | hohe Methodenkompetenz, wie in Ausschreibung beschrieben                                       | q    |
| 1652 | KI empfehlung,                                                                                                  | k    | berufserfahrung und methodenkompetenz, sprache höher als bei der konkurrierenden person, KI empfehlung                         | q, k | gute methodenkomp & Berufserfahrung, KI Empfehlung                                             | q, k |
| 1663 | KI empfehlung, mehr soziale Skills und berufserfahurng                                                          | q, k | Ki empfehlung, mehr methoden kompetenz und berufserfahurng                                                                     | q, k | Ki empfehlung und hohe methodenkompetenz                                                       | q, k |
| 1681 | Der Bewerber hat mehr Berufserfahrung und zusätzlich bessere soziale Fähigkeiten                                | q    | Die Berufserfahrung und die Methodenkompetenz sind höher als bei der Mitbewerberin                                             | q    | Die Methodenkompetenz ist wesentlich höher. auch eine solide Berufserfahrung ist vorhanden     | q    |
| 1684 | höherer Abschluss, und geringeres Alter                                                                         | q    | Ausgewogenere Verteilung der Fähigkeiten;Jünger                                                                                | q, a | anderer Bewerber nur geringe Methodenkompetenz                                                 | q    |
| 1690 | Erfahrung und Soziale Skills sind wichtiger als ein Top Abschluss                                               | q    | Kompetenter                                                                                                                    | o    | Kompetenter                                                                                    | o    |
| 1694 | Sehr guter Abschluss und Methodenkompetenz                                                                      | q    | Abschluss und Berufserfahrung überwiegen.                                                                                      | q    | Gute Methodenkompetenz.                                                                        | q    |
| 1711 | Berufserfahrung und Soziale Skills überzeugen                                                                   | q    | überall gut abgeschnitten                                                                                                      | q    | Methodenkompetenz entscheidend für diesen Bewerber                                             | q    |

|                            |                                                                                                                                                                                                                                              |      |                                                                                                                                                                                                    |      |                                                                                                                                                                                                                                                                       |         |
|----------------------------|----------------------------------------------------------------------------------------------------------------------------------------------------------------------------------------------------------------------------------------------|------|----------------------------------------------------------------------------------------------------------------------------------------------------------------------------------------------------|------|-----------------------------------------------------------------------------------------------------------------------------------------------------------------------------------------------------------------------------------------------------------------------|---------|
| 1717                       | besserer Allrounder                                                                                                                                                                                                                          | o    | methodenkompetenz ist verbesserungswürdig, aber kann man besser erlernen als soziale skills                                                                                                        | q    | methodenkompetenz lässt sich leichter erlernen als soziale skills                                                                                                                                                                                                     | q       |
| 1726                       | KI-Empfehlung                                                                                                                                                                                                                                | k    | BERufserfahrung, Methodenkompetenz                                                                                                                                                                 | q    | Berufserfahrung, Methodenkompetenz                                                                                                                                                                                                                                    | q       |
| 1748                       | Methodenkompetenz                                                                                                                                                                                                                            | q    | Berufserfahrung und Methodenkompetenz                                                                                                                                                              | q    | Methodenkompetenz.                                                                                                                                                                                                                                                    | q       |
| 1755                       | soziale Skills im Projektmanagement wichtig                                                                                                                                                                                                  | q    | auch hier lässt sich Berufserfahrung erleben, soziale Skills nur schwer                                                                                                                            | q    | fehlende Berufserfahrung im jungen alter nicht sehr relevant                                                                                                                                                                                                          | q, a    |
| 1769                       | Berufserfahrung, Soziale Skills besser                                                                                                                                                                                                       | q    | mehr Erfahrung                                                                                                                                                                                     | q    | Berufserfahrung &Methodenkompetenz besser (hoch relevant)                                                                                                                                                                                                             | q       |
| 1772                       | Berufserfahrung                                                                                                                                                                                                                              | q    | Erfahrung                                                                                                                                                                                          | q    | social                                                                                                                                                                                                                                                                | q       |
| 1785                       | Die beiden Bewerber sind sich sehr ähnlich habe insgesamt gleich viele Sterne über die Kategorien. Der Punkt, warum ich mich für die Person entscheiden habe, liegt am Alter, da es perspektivisch für das Unternehmen mehr potential hätte. | q, a | Auch hier, beide Bewerber sind sich sehr ähnlich und ich habe mich auf Grund des Alters und das Potential für die Zukunft entschieden.                                                             | q    | Beide Bewerber haben gleich viele Sterne insgesamt. Aber der Ausschlaggebende Punkt waren hier die große Differenz in der Methodenkompetenz. Eine Differenz von 3 Sternen bei einer wichtigen Fähigkeit ist dann doch zu groß. Und er wird auch von der KI empfohlen. | q, k    |
| 1794                       | Soziale Skills                                                                                                                                                                                                                               | q    | Soziale Skills > Methodenkompetenz, Mitbewerberin steht fast vor Renteneintritt.                                                                                                                   | q, a | Zu wenig Methodenkompetenz beim Mitbewerber, insb. für eine Führungsrolle hat der Rest dann nicht gereicht                                                                                                                                                            | q       |
| 1805                       | ist kompetenter                                                                                                                                                                                                                              | o    | Empfehlung                                                                                                                                                                                         | k    | Empfehlung                                                                                                                                                                                                                                                            | k       |
| 1821                       | Empfehlung                                                                                                                                                                                                                                   | k    | KI                                                                                                                                                                                                 | k    | Auch wenn er älter ist ist er vermutlich besser (KI)                                                                                                                                                                                                                  | q, k, a |
| 1822                       | gut                                                                                                                                                                                                                                          | o    | wichtig                                                                                                                                                                                            | o    | methoden                                                                                                                                                                                                                                                              | q       |
| 1837                       | gute soziale Skills und Berufserfahrung                                                                                                                                                                                                      | q    | jünger, gute soziale Skills                                                                                                                                                                        | q, a | gute Methodenkompetenz                                                                                                                                                                                                                                                | q       |
| 1844                       | Mehr Sozialkompetenz                                                                                                                                                                                                                         | q    | Mehr Soziale Skills                                                                                                                                                                                | q    | Mehr Soziale Skills                                                                                                                                                                                                                                                   | q       |
| 1852                       | mehr Berufserfahrung und soziale Skills, nur geringer Unterschied in Methodenkompetenz                                                                                                                                                       | q    | bessere soziale Skills und jünger                                                                                                                                                                  | q, a | anderer Bewerber hatte nur sehr geringe Methodenkompetenz                                                                                                                                                                                                             | q       |
| 1855                       | Methodenkompetenz besser                                                                                                                                                                                                                     | q    | Jünger                                                                                                                                                                                             | a    | Methodenkompetenz besser                                                                                                                                                                                                                                              | q       |
| <b>Condition 4 – Job 3</b> |                                                                                                                                                                                                                                              |      |                                                                                                                                                                                                    |      |                                                                                                                                                                                                                                                                       |         |
| 1336                       | Mehr Softwareerfahrung und Besserer Abschluss gleichen geringere Berufserfahrung m.E. aus, lassen auf Entwicklungspotential schließen                                                                                                        | q    | Sprache in diesem Bereich nicht so wichtig; Abschluss und Berufserfahrung gleichwertig o.besser                                                                                                    | q    | KI Empfehlung, sonst würde ich vermutlich keine der Kandidat:innen wählen                                                                                                                                                                                             | k       |
| 1368                       | insgesamt besser                                                                                                                                                                                                                             | o    | mehr softwareerfahrung                                                                                                                                                                             | q    | abschluss & software                                                                                                                                                                                                                                                  | q       |
| 1372                       | beim anderen Bewerber lag der Schwerpunkt auf den sozialen Skills. Hier ist eine gute Mischung von allem dabei.                                                                                                                              | q    | Finde soziale Skills sollten mindestens 3 Sterne sein, da Umgang unter den Kollegen auch wichtig ist. Außerdem bringt sie auch sonst alles mit außer Softwarekenntnisse könnten verbessert werden. | q    | Konkurrent hat zu wenig Berufserfahrung und zu wenig Soziale Skills, Bewerberin hat das bessere Gesamtpaket                                                                                                                                                           | q       |
| 1395                       | Sprache, Software, Abschluss                                                                                                                                                                                                                 | q    | Software                                                                                                                                                                                           | q    | Abschluss, Software                                                                                                                                                                                                                                                   | q       |
| 1396                       | keine Angabe                                                                                                                                                                                                                                 | x    | Der Abschluss muss nicht immer eine Rolle spielen                                                                                                                                                  | q    | Mehr Berufserfahrung sowie soziale Skills                                                                                                                                                                                                                             | q       |

|      |                                                                                                                          |      |                                                                                                  |      |                                                                                                                                                                                                      |      |
|------|--------------------------------------------------------------------------------------------------------------------------|------|--------------------------------------------------------------------------------------------------|------|------------------------------------------------------------------------------------------------------------------------------------------------------------------------------------------------------|------|
| 1413 | besserer Abschluss und Softwarekenntnisse, soziale Skills keine Priorität für den Job                                    | q    | bessere Softwareerfahrung, ansonsten fast gleich gute q                                          | q    | Berufserfahrung geringer, aber besserer Abschluss und Softwareerfahrung                                                                                                                              | q    |
| 1420 | Kandidatin scheint besser zu sein; KI Empfehlung                                                                         | o, k | KI Empfehlung, Kandidaten sahen ähnlich aus                                                      | k    | Kandidat hat mehr Sterne in Software Erfahrung und Abschluss                                                                                                                                         | q    |
| 1440 | KI-Empfehlung, mehr Sterne                                                                                               | k    | KI-Empfehlung, mehr Sterne                                                                       | k    | KI-Empfehlung                                                                                                                                                                                        | k    |
| 1459 | Allgemein besser                                                                                                         | o    | Beide eig. gleich gut aber man muss sich entscheiden                                             | q    | Ausgeglichene Erfahrung                                                                                                                                                                              | q    |
| 1475 | Tendenziell bessere Kompetenz                                                                                            | o    | KI Empfehlung                                                                                    | k    | KI Empfehlung                                                                                                                                                                                        | k    |
| 1502 | Frau Decker hat den besseren Abschluss und mehr Softwareerfahrung.                                                       | q    | Frau Richter schneidet in den Kategorien Abschluss, Berufserfahrung und soziale Skills besser ab | q    | Frau Ostermann hat mehr Erfahrung und deutlich bessere Soziale Skills. Ihr Abschluss und die Softwareerfahrung ist wenig schlechter in der Bewertung und beides nicht in einem inakzeptablen Bereich | q    |
| 1504 | höhere soziale skills                                                                                                    | q    | höhere sprachkompetenz                                                                           | q    | mehr berufserfahrung                                                                                                                                                                                 | q    |
| 1512 | KI Empfehlung                                                                                                            | k    | bbessere bewertung außer Abschluss                                                               | q    | Besser bzgl. Sprachen, Abschluss und Software                                                                                                                                                        | q    |
| 1523 | mehr Erfahrung im Bereich software                                                                                       | q    | bessere soziale Skills                                                                           | q    | mehr Erfahrung im Bereich Software                                                                                                                                                                   | q    |
| 1531 | Gesamtpaket                                                                                                              | q    | Gesamtpaket                                                                                      | o    | Softwareerfahrung                                                                                                                                                                                    | q    |
| 1538 | social skills irrelevant, Geringere Berufserfahrung wird kompensiert durch höhere Softwareerfahrung und gutem Abschluss. | q    | Ähnliches Kompetenzniveau, kleiner Vorteil durch höhere Softwareerfahrung.                       | q    | social skills für stelle irrelevant, Softwareerfahrung und Abschluss überzeugen. Einzig Berufserfahrung ausbaubar.                                                                                   | q    |
| 1542 | besserer abschluss, bessere softwareerfahrung                                                                            | q    | mehr softwareerfahrung                                                                           | q    | wenig berufserfahrung aber gute softwareskills                                                                                                                                                       | q    |
| 1558 | Softwareerfahrung                                                                                                        | q    | sehr ähnliche Skills, daher Entscheidung bei Software                                            | q    | KI-Empfehlung                                                                                                                                                                                        | k    |
| 1565 | Erscheint qualifiziert                                                                                                   | o    | Frauenquote erhöhen                                                                              | e, g | Frauenquote erhöhen                                                                                                                                                                                  | e, g |
| 1570 | Mehr Softwareerfahrung, wichtiger für Buchhaltung                                                                        | q    | Mehr Software & Berufserfahrung, für den Bereich wichtiger                                       | q    | Empfehlung der KI, rest war beides ok                                                                                                                                                                | q, k |
| 1581 | mehr Punkte bei Berufserfahrung und soz. Skills                                                                          | q    | bessere Softwareerfahrung                                                                        | q    | mehr Berufserfahrung                                                                                                                                                                                 | q    |
| 1588 | Besserer Abschluss                                                                                                       | q    | höherer Abschluss und Berufserfahrung                                                            | q    | Mehr Berufserfahrung                                                                                                                                                                                 | q    |
| 1617 | Mehr Software Erfahrung                                                                                                  | q    | mehr software erfahrung                                                                          | q    | mehr berufserfahrung                                                                                                                                                                                 | q    |
| 1619 | mehr Sprachen - KI-Empfehlung - höherer Abschluss                                                                        | q, k | KI-Empfehlung - höherer Abschluss                                                                | q, k | mehr Sprachen - höherer Abschluss - mehr Softwareerfahrung                                                                                                                                           | q    |
| 1627 | Soziale skills sind hier nicht ausschlaggebend                                                                           | q    | Sehr ähnlich aber jünger und besserer Abschluss                                                  | q, a | Berufserfahrung muss nicht ausschlaggebend sein, dafür bessere Softwareerfahrung                                                                                                                     | q    |
| 1641 | besserer Abschluss und Softwareerfahrung                                                                                 | q    | Unterschiede von je nur einem Punkt, dann der KI                                                 | q, k | würde mich jetzt eigentlich gerne umentscheiden, geht leider nicht                                                                                                                                   | x    |
| 1642 | mehr Berufserfahrung                                                                                                     | q    | Besserer Abschluss & Berufserfahrung                                                             | q    | Berufserfahrung scheint mir bei dieser Stelle als besonders relevant                                                                                                                                 | q    |

|      |                                                                                                                                                            |      |                                                                                                                                                  |      |                                                                                      |      |
|------|------------------------------------------------------------------------------------------------------------------------------------------------------------|------|--------------------------------------------------------------------------------------------------------------------------------------------------|------|--------------------------------------------------------------------------------------|------|
| 1652 | bessere Attribute, welche für die Buchhaltung wichtiger sind als für andere bereiche, KI Empfehlung                                                        | q, k | Berufserfahrung, sprachen und softwareerfahrung höher als bei der anderen person, abschluss zwar niedriger aber immernoch überdurchschnittlich   | q    | KI Empfehlung                                                                        | k    |
| 1663 | mehr Berufserfahrung und soziale Fähigkeiten                                                                                                               | q    | Besserer Abschluss und soziale Fähigkeiten bei mehr Berufserfahrung                                                                              | q    | höhere soziale Skills+ KI empfehlung                                                 | q, k |
| 1681 | Die Softwareerfahrung ist höher, somit könnte die Einarbeitung nicht so lange dauern                                                                       | q    | Die Softwareerfahrung ist höher                                                                                                                  | q    | Die Berufserfahrung ist höher, das kann die fehlende Softwareerfahrung ausgleichen   | q    |
| 1684 | mehr Erfahrung in relevante Positionen (Softskills in diesem Bereich m.E. nicht sehr relevant)                                                             | q    | würde beide einladen. Sehr ähnlich                                                                                                               | q    | höherer Abschluss; mehr Softwareerfahrung                                            | q    |
| 1690 | Kompetenter                                                                                                                                                | o    | Besser außer soziale Skills, die hier nicht so bedeutend sind                                                                                    | q    | Mehr softwareerfahrung und besserer Abschluss                                        | q    |
| 1694 | Besserer Abschluss.                                                                                                                                        | q    | Besserer Abschluss.                                                                                                                              | q    | Besseres Gesamtergebnis                                                              | o    |
| 1711 | Überall mittemäßig, anderer Bewerber ggf. zu gesprächig, da sehr hoch in Sozialen Skills                                                                   | q    | Softwareerfahrung kann erlernt werden, Rest gut                                                                                                  | q    | anderer Bewerber wenig Berufserfahrung und wenige soziale Skills                     | q    |
| 1717 | bessere softwareerfahrung, soziale skills sind hier nicht so wichtig                                                                                       | q    | mehr softwareerfahrung, gleiche berufserfahrung                                                                                                  | q    | bessere sternebewertung außer bei der berufserfahrung, was aber nicht so schlimm ist | q    |
| 1726 | mehr Berufserfahrung                                                                                                                                       | q    | KI-Empfehlung                                                                                                                                    | k    | mehr Berufserfahrung                                                                 | q    |
| 1748 | Soziale Skills                                                                                                                                             | q    | Abschluss.                                                                                                                                       | q    | Soziale Skills                                                                       | q    |
| 1755 | super Abschluss und mehr Sprach- und Softwarekenntnis                                                                                                      | q    | top Abschluss und viel Berufserfahrung. Sprache in der Buchhaltung eher unwichtig                                                                | q    | ein wenig mehr Berufserfahrung und deutlich höhere soziale Skills                    | q    |
| 1769 | Softwareerfahrung + Abschluss besser                                                                                                                       | q    | Abschluss nicht so relevant vergl. mit Softwareerfahrung                                                                                         | q    | ausgeglicheneres Profil                                                              | o    |
| 1772 | Softwareerfahrung                                                                                                                                          | q    | Softwareerfahrung                                                                                                                                | q    | Skills                                                                               | o    |
| 1785 | Sind fast gleich, habe hier auf die KI gehört                                                                                                              | k    | Sind gleich was die Sterne angeht aber sie ist jünger und von der KI empfohlen                                                                   | a, k | Sind fast gleich auch vom alter, aber von Ki empfohlen und mehr Eerufserfahrung      | q    |
| 1794 | Sprachen sind in der Buchhaltung nicht so wichtig, Berufserfahrung war hier mehr gegeben und starke soziale Skills. Softwareerfahrung kann erlangt werden. | q    | Sprachen nicht so wichtig, Abschluss zweitrangig. Bei gleicher Berufserfahrung mehr soziale Skills. Weniger Softwareerfahrung ist verschmerzbar. | q    | Mehr Soziale Skills und mehr Berufserfahrung.                                        | q    |
| 1805 | ist besser                                                                                                                                                 | o    | Empfehlung, ist geeigneter                                                                                                                       | o, k | Ist geeigneter                                                                       | o    |
| 1821 | KI                                                                                                                                                         | k    | KI                                                                                                                                               | k    | KI                                                                                   | k    |
| 1822 | Programmieren                                                                                                                                              | q    | KI                                                                                                                                               | k    | KI                                                                                   | k    |
| 1837 | mehr Berufserfahrung, mehr soziale Skills                                                                                                                  | q    | bessere soziale Skills                                                                                                                           | q    | besserer Abschluss                                                                   | q    |
| 1844 | Mehr Berufs- und Softwareerfahrungen                                                                                                                       | q    | Mehr Softwareerfahrungen                                                                                                                         | q    | Höherer Abschluss und mehr Softwareerfahrungen                                       | q    |
| 1852 | KI-Empfehlung                                                                                                                                              | k    | Softwareerfahrung stärker gewichtet als soziale Skills und Abschluss, wobei Abschluss bei beiden gut                                             | q    | KI-Empfehlung                                                                        | k    |
| 1855 | Softwareerfahrung besse                                                                                                                                    | q    | bessere Softwareerfahrung                                                                                                                        | q    | bessere Softwareerfahrung                                                            | q    |
